# Supplementary material
Source: PubMed Central journal article supplement (PMC10354673)
Supplement: jama-e2310875-s001.pdf [file jama-e2310875-s001.pdf]

## Supplemental Online Content

Khurshid S, Al-Alusi MA, Churchill TW, Guseh JS, Ellinor PT. Accelerometer-derived “weekend warrior” physical activity and incident cardiovascular disease. *JAMA*. doi:10.1001/jama.2023.10875

**eMethods.** Supplemental methods

**eTable 1.** Disease Definitions

**eTable 2.** Covariate Definitions

**eTable 3.** Sample Characteristics Stratified at Activity Threshold of  $\geq 230.4$  Minutes of MVPA Per Week (Sample Median)

**eTable 4.** Sample Characteristics of Individuals in Primary Analysis Sample Versus Individuals Excluded for Incomplete Accelerometer Data

**eTable 5.** Associations Between Physical Activity Pattern and Incident Cardiovascular Disease Across Varying MVPA Thresholds

**eTable 6.** Associations Between Physical Activity Pattern and Incident Cardiovascular Disease Using Activity Threshold of  $\geq 150$  Minutes of MVPA Per Week (Guideline-Based)

**eTable 7.** Associations Between Physical Activity Pattern and Incident Cardiovascular Disease Using Activity Threshold of  $\geq 230.4$  Minutes of MVPA Per Week (Sample Median)

**eTable 8.** Associations Between Physical Activity Pattern and Incident Cardiovascular Disease With 2-Year Blanking Period After Accelerometer

**eTable 9.** Associations Between Physical Activity Pattern and Incident Cardiovascular Disease In Models Additionally Adjusted For Body Mass Index, Blood Pressure, Anti-hypertensive Use, and Diabetes

**eTable 10.** Associations Between Physical Activity Pattern and Incident Cardiovascular Disease With Individuals With Incomplete Accelerometer Data Assumed to be Inactive

**eTable 11.** Associations Between Physical Activity Pattern and Incident Cardiovascular Disease Among Individuals With Complete Wear Time (No Imputed Values)

**eTable 12.** Associations Between Physical Activity Pattern and Incident Musculoskeletal Disease

**eFigure 1.** Study Flow

**eFigure 2.** Distribution of Moderate-to-Vigorous Physical Activity on Top Two Days Versus Remaining Five Days Among Active Individuals Based on Guideline-Based Threshold of  $\geq 230.4$  Minutes of MVPA Per Week (Sample Median)

**eFigure 3.** Cumulative Risk of Incident Cardiovascular Events Stratified by Activity Pattern Using an Activity Threshold of  $\geq 150$  Minutes of MVPA Per Week (Guideline-Based)

**eFigure 4.** Cumulative Risk of Incident Cardiovascular Events Stratified by Activity Pattern Using an Activity Threshold of  $\geq 230.4$  Minutes of MVPA Per Week (Sample Median)

**eFigure 5.** Associations Between Physical Activity Pattern and Incident Cardiovascular Disease Utilizing Alternative Definitions of Weekend Warrior Activity

**eFigure 6.** Cumulative Risk of Incident Musculoskeletal Conditions Stratified by Activity Pattern

**eReferences**

This supplemental material has been provided by the authors to give readers additional information about their work.

## **eMethods.** Supplemental methods

### *MVPA Classification*

We utilized a previously validated machine learning-based method of MVPA classification developed by Walmsley et al.<sup>1</sup> Briefly, algorithms were trained on 150 individuals wearing an Axivity AX3 device whose free-living activities were classified manually using visual inspection. A wide range of activity types (e.g., walking, jogging, stationary cycling, elliptical, and others) were labeled. Daily proportion of time spent performing MVPA was converted to daily minutes of MVPA, which was then classified into categories of Inactive, Active-Weekend Warrior, and Active-Regular as described in the main manuscript. To ensure accurate classification of activity patterns, we excluded individuals with less than a full week of acceleration data available (allowing imputed values, see **eFigure 1**). All variables utilized are available to registered researchers using the UK Biobank Data Showcase (Moderate-Vigorous Day average: Field 40045, Daily wear time: Fields 90053-90059, Completeness of acceleration epochs: Field 90004).

### *Covariate ascertainment*

Clinical factors for multivariable adjustment were selected *a priori* based on known or suspected associations with physical activity and cardiovascular disease.<sup>1,2</sup> A detailed list of covariate definitions and categorization (when relevant) is provided in **eTable 2**. Diabetes was defined using a combination of self-reported diagnoses, medication use, and inpatient diagnosis codes (**eTable 1**). All other factors were defined based on baseline data from study visits. The majority of data was ascertained at the initial assessment visit, spanning 3/2006-10/2010. However, roughly 10% of individuals provided further data at the first follow-up visit, spanning 12/2009-6/2013. Where indicated, we prioritized data from the follow-up visit given closer proximity prior to accelerometry.

### *Incident disease analyses*

For longitudinal analyses, person-time began at the end of accelerometer wear. Individuals with a given disease (e.g., atrial fibrillation) prevalent at the start of follow-up were excluded from longitudinal analyses for that outcome. Follow-up was censored at the earliest of an event, death, or last follow-up. Given a low 5-year cumulative risk of death (2.1%, 95% CI 2.0-2.2), death was treated as a censoring event in all analyses. The date of last follow-up was March 31, 2021 for individuals enrolled in England and Scotland, and February 28, 2018 for individuals enrolled in Wales.

### *Secondary analyses*

We performed several secondary analyses to assess the robustness of our findings. First, given that varying activity patterns may affect injury risk,<sup>3</sup> we assessed for associations between activity pattern and incident musculoskeletal injuries and related

conditions (definitions provided in **eTable 1**). Second, to assess whether associations between activity and disease may have been driven by reverse causation, we repeated association testing in a landmark analysis in which person-time began two years after measured activity exposure. Third, since certain factors may confound associations between physical activity and disease (e.g., body mass index), yet are likely on the causal pathway, we fit models additionally adjusted for body mass index, systolic blood pressure, diastolic blood pressure, and prevalent diabetes. Fourth, to assess whether our results may be biased by exclusion of individuals based on accelerometer data availability criteria, we repeated the primary analyses while including individuals with less than one week of data available and classifying them as Inactive. Fifth, we assessed alternative definitions of the WW pattern, including  $\geq 75\%$  of total MVPA over 1-2 days,  $\geq 50\%$  of total MVPA over 1-2 consecutive days, and  $\geq 50\%$  of total MVPA over 1-2 weekend days.

#### *Data and code availability*

UK Biobank data are available by application (<https://www.ukbiobank.ac.uk/enable-your-research/register>). Data processing scripts underlying the current analysis can be found at [www.github.com/shaankhurshid/ukb\\_weekend\\_warrior](https://www.github.com/shaankhurshid/ukb_weekend_warrior).

**eTable 1. Disease definitions**

| Phenotype           | Data fields                      | Field names                                                                                                                                           | Data codes                                                                                                                                                                      | Data code definitions                                                                                                                                                                                                                                                                                                                                                                                                                                                                                                                                                                                                                                                                                                                                                                                                                                                                                                                                                                                                                                                                                                                                |
|---------------------|----------------------------------|-------------------------------------------------------------------------------------------------------------------------------------------------------|---------------------------------------------------------------------------------------------------------------------------------------------------------------------------------|------------------------------------------------------------------------------------------------------------------------------------------------------------------------------------------------------------------------------------------------------------------------------------------------------------------------------------------------------------------------------------------------------------------------------------------------------------------------------------------------------------------------------------------------------------------------------------------------------------------------------------------------------------------------------------------------------------------------------------------------------------------------------------------------------------------------------------------------------------------------------------------------------------------------------------------------------------------------------------------------------------------------------------------------------------------------------------------------------------------------------------------------------|
| Atrial fibrillation | 20002                            | Non-cancer illness code, self-reported                                                                                                                | 1471, 1483                                                                                                                                                                      | Atrial fibrillation, Atrial flutter                                                                                                                                                                                                                                                                                                                                                                                                                                                                                                                                                                                                                                                                                                                                                                                                                                                                                                                                                                                                                                                                                                                  |
| Atrial fibrillation | 20004                            | Operation code, self-reported                                                                                                                         | 1524                                                                                                                                                                            | Cardioversion                                                                                                                                                                                                                                                                                                                                                                                                                                                                                                                                                                                                                                                                                                                                                                                                                                                                                                                                                                                                                                                                                                                                        |
| Atrial fibrillation | 41202<br>41204<br>40001<br>40002 | Diagnoses - main ICD10<br>Diagnoses – secondary ICD10<br>Underlying (primary) cause of death: ICD10<br>Contributory (secondary) cause of death: ICD10 | I48, I48.0, I48.1, I48.2, I48.3, I48.4, I48.9                                                                                                                                   | Atrial fibrillation and flutter, Paroxysmal atrial fibrillation, Persistent atrial fibrillation, Chronic atrial fibrillation, Typical atrial flutter, Atypical atrial flutter, Atrial fibrillation and flutter, unspecified                                                                                                                                                                                                                                                                                                                                                                                                                                                                                                                                                                                                                                                                                                                                                                                                                                                                                                                          |
| Atrial fibrillation | 41203<br>41205                   | Diagnosis - main ICD9<br>Diagnoses - secondary ICD9                                                                                                   | 4273                                                                                                                                                                            | Atrial fibrillation and flutter                                                                                                                                                                                                                                                                                                                                                                                                                                                                                                                                                                                                                                                                                                                                                                                                                                                                                                                                                                                                                                                                                                                      |
| Atrial fibrillation | 41200<br>41210                   | Operative procedures – main OPCS<br>Operative procedures – secondary OPCS                                                                             | K57.1, K62.1, K62.2, K62.3, K62.4, X50.1, X50.2                                                                                                                                 | Percutaneous transluminal ablation of atrioventricular node, Percutaneous transluminal ablation of pulmonary vein to left atrium conducting system, Percutaneous transluminal ablation of atrial wall for atrial flutter, Percutaneous transluminal ablation of conducting system of heart for atrial flutter NEC, Percutaneous transluminal internal cardioversion NEC, Direct current cardioversion, External cardioversion NEC                                                                                                                                                                                                                                                                                                                                                                                                                                                                                                                                                                                                                                                                                                                    |
| Diabetes            | 2443                             | Diabetes diagnosed by doctor                                                                                                                          | 1                                                                                                                                                                               | Yes                                                                                                                                                                                                                                                                                                                                                                                                                                                                                                                                                                                                                                                                                                                                                                                                                                                                                                                                                                                                                                                                                                                                                  |
| Diabetes            | 20002                            | Non-cancer illness code, self-reported                                                                                                                | 1220, 1221, 1222, 1223                                                                                                                                                          | Diabetes, Gestational diabetes, Type 1 diabetes, Type 2 diabetes                                                                                                                                                                                                                                                                                                                                                                                                                                                                                                                                                                                                                                                                                                                                                                                                                                                                                                                                                                                                                                                                                     |
| Diabetes            | 2986                             | Insulin use within one year                                                                                                                           | 1                                                                                                                                                                               | Started insulin within one year diagnosis of diabetes - Yes                                                                                                                                                                                                                                                                                                                                                                                                                                                                                                                                                                                                                                                                                                                                                                                                                                                                                                                                                                                                                                                                                          |
| Diabetes            | 6177                             | Medication for cholesterol, blood pressure or diabetes                                                                                                | 3                                                                                                                                                                               | Insulin                                                                                                                                                                                                                                                                                                                                                                                                                                                                                                                                                                                                                                                                                                                                                                                                                                                                                                                                                                                                                                                                                                                                              |
| Diabetes            | 6153                             | Medication for cholesterol, blood pressure, diabetes, or take exogenous hormones                                                                      | 3                                                                                                                                                                               | Insulin                                                                                                                                                                                                                                                                                                                                                                                                                                                                                                                                                                                                                                                                                                                                                                                                                                                                                                                                                                                                                                                                                                                                              |
| Diabetes            | 41202<br>41204<br>40001<br>40002 | Diagnoses - main ICD10<br>Diagnoses – secondary ICD10<br>Underlying (primary) cause of death: ICD10<br>Contributory (secondary) cause of death: ICD10 | E10, E10.0, E10.1, E10.2, E10.3, E10.4, E10.5, E10.6, E10.7, E10.8, E10.9, E11, E11.0, E11.1, E11.2, E11.3, E11.4, E11.5, E11.6, E11.7, E11.8, E11.9, E12, E12.1, E12.8, E12.9, | Insulin-dependent diabetes mellitus, Insulin-dependent diabetes mellitus with coma, Insulin-dependent diabetes mellitus with ketoacidosis, Insulin-dependent diabetes mellitus with renal complications, Insulin-dependent diabetes mellitus with ophthalmic complications, Insulin-dependent diabetes mellitus with neurological complications, Insulin-dependent diabetes mellitus with peripheral circulatory complications, Insulin-dependent diabetes mellitus with other specified complications, Insulin-dependent diabetes mellitus with multiple complications, Insulin-dependent diabetes mellitus with unspecified complications, Insulin-dependent diabetes mellitus without complications, Non-insulin-dependent diabetes mellitus, Non-insulin-dependent diabetes mellitus - with coma, Non-insulin-dependent diabetes mellitus - with ketoacidosis, Non-insulin-dependent diabetes mellitus - with renal complications, Non-insulin-dependent diabetes mellitus - with ophthalmic complications, Non-insulin-dependent diabetes mellitus - with neurological complications, Non-insulin-dependent diabetes mellitus - with peripheral |

| Phenotype              | Data fields                      | Field names                                                                                                                                           | Data codes                                                                                                                             | Data code definitions                                                                                                                                                                                                                                                                                                                                                                                                                                                                                                                                                                                                                                                                                                                                                                                                                                                                                                                                                                                                                                                                                                                                                                                                                                                                                                                                                                                                                                                                                                                                                                                                                                                                                                                                                    |
|------------------------|----------------------------------|-------------------------------------------------------------------------------------------------------------------------------------------------------|----------------------------------------------------------------------------------------------------------------------------------------|--------------------------------------------------------------------------------------------------------------------------------------------------------------------------------------------------------------------------------------------------------------------------------------------------------------------------------------------------------------------------------------------------------------------------------------------------------------------------------------------------------------------------------------------------------------------------------------------------------------------------------------------------------------------------------------------------------------------------------------------------------------------------------------------------------------------------------------------------------------------------------------------------------------------------------------------------------------------------------------------------------------------------------------------------------------------------------------------------------------------------------------------------------------------------------------------------------------------------------------------------------------------------------------------------------------------------------------------------------------------------------------------------------------------------------------------------------------------------------------------------------------------------------------------------------------------------------------------------------------------------------------------------------------------------------------------------------------------------------------------------------------------------|
|                        |                                  |                                                                                                                                                       | E13, E13.1, E13.2, E13.3, E13.5, E13.6, E13.7, E13.8, E13.9, E14, E14.0, E14.1, E14.2, E14.3, E14.4, E14.5, E14.6, E14.7, E14.8, E14.9 | circulatory complications, Non-insulin-dependent diabetes mellitus - with other specified complications, Non-insulin-dependent diabetes mellitus - with multiple complications, Non-insulin-dependent diabetes mellitus - with unspecified complications, Non-insulin-dependent diabetes mellitus - without complications, Malnutrition-related diabetes mellitus, Malnutrition-related diabetes mellitus with ketoacidosis, Malnutrition-related diabetes mellitus with unspecified complications, Malnutrition-related diabetes mellitus without complications, Other specified diabetes mellitus, Other specified diabetes mellitus with ketoacidosis, Other specified diabetes mellitus with renal complications, Other specified diabetes mellitus with ophthalmic complications, Other specified diabetes mellitus with peripheral circulatory complications, Other specified diabetes mellitus with other specified complications, Other specified diabetes mellitus with multiple complications, Other specified diabetes mellitus with unspecified complications, Other specified diabetes mellitus without complications, Unspecified diabetes mellitus, Unspecified diabetes mellitus with coma, Unspecified diabetes mellitus with ketoacidosis, Unspecified diabetes mellitus with renal complications, Unspecified diabetes mellitus with ophthalmic complications, Unspecified diabetes mellitus with neurological complications, Unspecified diabetes mellitus with peripheral circulatory complications, Unspecified diabetes mellitus with other specified complications, Unspecified diabetes mellitus with multiple complications, Unspecified diabetes mellitus with unspecified complications, Unspecified diabetes mellitus without complications |
| Diabetes               | 41203<br>41205                   | Diagnosis - main ICD9<br>Diagnoses - secondary ICD9                                                                                                   | 2500, 25000, 25001, 25009, 2501, 25011, 25019, 2503, 2504, 2505, 25099                                                                 | Diabetes mellitus without mention of complication, Diabetes mellitus without mention of complication (adult-onset type), Diabetes mellitus without mention of complication (juvenile type), Diabetes mellitus without mention of compl. (adult/juvenile unspec.), Diabetes with ketoacidosis, Diabetes with ketoacidosis (juvenile type), Diabetes with ketoacidosis (adult/juvenile unspec.), Diabetes with renal manifestations, Diabetes with ophthalmic manifestations, Diabetes with neurological manifestations, Diabetes with unspecified complications (unspecified onset)                                                                                                                                                                                                                                                                                                                                                                                                                                                                                                                                                                                                                                                                                                                                                                                                                                                                                                                                                                                                                                                                                                                                                                                       |
| Heart Failure          | 20002                            | Non-cancer illness code, self-reported                                                                                                                | 1076, 1079                                                                                                                             | Heart failure/pulmonary oedema, Cardiomyopathy                                                                                                                                                                                                                                                                                                                                                                                                                                                                                                                                                                                                                                                                                                                                                                                                                                                                                                                                                                                                                                                                                                                                                                                                                                                                                                                                                                                                                                                                                                                                                                                                                                                                                                                           |
| Heart Failure          | 41202<br>41204<br>40001<br>40002 | Diagnoses - main ICD10<br>Diagnoses – secondary ICD10<br>Underlying (primary) cause of death: ICD10<br>Contributory (secondary) cause of death: ICD10 | I11.0, I13.0, I13.2, I25.5, I42.0, I42.5, I42.8, I42.9, I50, I50.0, I50.1, I50.9                                                       | Hypertensive heart disease with (congestive) heart failure, Hypertensive heart and renal disease with (congestive) heart failure, Hypertensive heart and renal disease with both (congestive) heart failure and renal failure, Hypertensive heart disease with (congestive) heart failure, Hypertensive heart and renal disease with (congestive) heart failure, Hypertensive heart and renal disease with both (congestive) heart failure and renal failure, Ischaemic cardiomyopathy, Dilated cardiomyopathy, Other restrictive cardiomyopathy, Other cardiomyopathies, Cardiomyopathy, unspecified, Heart failure, Congestive heart failure, Left ventricular failure, Heart failure, unspecified                                                                                                                                                                                                                                                                                                                                                                                                                                                                                                                                                                                                                                                                                                                                                                                                                                                                                                                                                                                                                                                                     |
| Musculoskeletal injury | 20002                            | Non-cancer illness code, self-reported                                                                                                                | 1266,1267,1294, 1295,1297,1311, 1312,1406,1532, 1533,1534,1536, 1537,1538,1540, 1541,1545,1618,                                        | Head injury, Spinal injury, Back problem, Joint disorder, Muscle/soft tissue problem, Spine arthritis/spondylitis, Prolapsed disc/slipped disc, Muscle or soft tissue injuries, Disc problem, Disc degeneration, Back pain, Spinal stenosis, Joint pain, Arthritis (NOS), Plantar fasciitis, Carpal tunnel syndrome, Neck problem/injury, Soft tissue inflammation, Tendonitis / tendinitis / tenosynovitis, Bursitis, Synovitis, Epicondylitis, Tennis elbow / lateral epicondylitis, Housemaid's knee (prepatellar bursitis), Fracture skull / head,                                                                                                                                                                                                                                                                                                                                                                                                                                                                                                                                                                                                                                                                                                                                                                                                                                                                                                                                                                                                                                                                                                                                                                                                                   |

| Phenotype              | Data fields                      | Field names                                                                                                                                           | Data codes                                                                                                                                                                | Data code definitions                                                                                                                                                                                                                                                                                                                                                                                                                                                                                                                                                                                                                                                                                                                                                                                                                                                                |
|------------------------|----------------------------------|-------------------------------------------------------------------------------------------------------------------------------------------------------|---------------------------------------------------------------------------------------------------------------------------------------------------------------------------|--------------------------------------------------------------------------------------------------------------------------------------------------------------------------------------------------------------------------------------------------------------------------------------------------------------------------------------------------------------------------------------------------------------------------------------------------------------------------------------------------------------------------------------------------------------------------------------------------------------------------------------------------------------------------------------------------------------------------------------------------------------------------------------------------------------------------------------------------------------------------------------|
|                        |                                  |                                                                                                                                                       | 1619,1620,1621,1622,1623,1624,1626,1627,1628,1629,1630,1631,1632,1633,1634,1635,1636,1637,1638,1639,1640,1644,1645,1646,1647,1648,1649,1650,1651,1652,1653,1654,1655,1656 | Fracture jaw, Fracture nose, Fracture face / orbit / eye socket, Fracture neck / cervical fracture, Fracture clavicle / collar bone, Fracture shoulder / scapula, Fracture upper arm / humerus / elbow, Fracture forearm / wrist, Fracture radius, Fracture ulna, Fracture wrist / Colles fracture, Fracture hand, Fracture finger, Fracture thumb, Fracture rib, Fracture sternum, Fracture vertebra / crush fracture / vertebral collapse, Fracture pelvis, Fracture neck of femur / hip, Fracture shaft of femur, Fracture patella / knee, Fracture lower leg / ankle, Fracture tibia, Fracture fibula, Fracture foot, Fracture metatarsal, Fracture toe                                                                                                                                                                                                                          |
| Musculoskeletal injury | 41202<br>41204<br>40001<br>40002 | Diagnoses - main ICD10<br>Diagnoses – secondary ICD10<br>Underlying (primary) cause of death: ICD10<br>Contributory (secondary) cause of death: ICD10 | Phecodes* 800, 801, 802, 803, 804, 805, 807, 809, 816, 817, 818, 819, 823, 830, 835, 836, 840, 841, 842, 905, 722, 724, 733.8, 740, 741, 742, 742.2,                      | Fracture of lower limb, Fracture of ankle and foot, Fracture of pelvis, Fracture of upper limb, Fracture of hand or wrist, Fracture of vertebral column without mention of spinal cord injury, Fracture of ribs, Fracture of unspecified bones, Cerebral laceration and contusion, Concussion, Intracranial hemorrhage (injury), Skull and face fracture and other intercranial injury, Torus fracture, Dislocation, Internal derangement of knee, Traumatic arthropathy, Sprains and strains, Sprains and strains of back and neck, Other sprains and strains, Late effects of musculoskeletal and connective tissue injuries, Intervertebral disc disorders, Other and unspecified disorders of back, Malunion and nonunion of fracture, Chondromalacia, Osteoarthritis, Symptoms and disorders of the joints, Derangement of joint, non-traumatic, Stress fracture, Pain in joint |
| Musculoskeletal injury | 41203<br>41205                   | Diagnosis - main ICD9<br>Diagnoses - secondary ICD9                                                                                                   | Phecodes* 800, 801, 802, 803, 804, 805, 807, 809, 816, 817, 818, 819, 823, 830, 835, 836, 840, 841, 842, 905, 722, 724, 733.8, 740, 741, 742, 742.2,                      | Fracture of lower limb, Fracture of ankle and foot, Fracture of pelvis, Fracture of upper limb, Fracture of hand or wrist, Fracture of vertebral column without mention of spinal cord injury, Fracture of ribs, Fracture of unspecified bones, Cerebral laceration and contusion, Concussion, Intracranial hemorrhage (injury), Skull and face fracture and other intercranial injury, Torus fracture, Dislocation, Internal derangement of knee, Traumatic arthropathy, Sprains and strains, Sprains and strains of back and neck, Other sprains and strains, Late effects of musculoskeletal and connective tissue injuries, Intervertebral disc disorders, Other and unspecified disorders of back, Malunion and nonunion of fracture, Chondromalacia, Osteoarthritis, Symptoms and disorders of the joints, Derangement of joint, non-traumatic, Stress fracture, Pain in joint |
| Myocardial infarction  | 20002                            | Non-cancer illness code, self-reported                                                                                                                | 1075                                                                                                                                                                      | Heart attack/myocardial infarction                                                                                                                                                                                                                                                                                                                                                                                                                                                                                                                                                                                                                                                                                                                                                                                                                                                   |
| Myocardial infarction  | 41202<br>41204<br>40001<br>40002 | Diagnoses - main ICD10<br>Diagnoses – secondary ICD10<br>Underlying (primary) cause of death: ICD10<br>Contributory (secondary) cause of death: ICD10 | I21, I21.0, I21.1, I21.2, I21.3, I21.4, I21.9, I22, I22.0, I22.1, I22.8, I22.9, I23, I23.0, I23.1, I23.2, I23.3, I23.4, I23.5,                                            | Acute myocardial infarction, Acute transmural myocardial infarction of anterior wall, Acute transmural myocardial infarction of inferior wall, Acute transmural myocardial infarction of other sites, Acute transmural myocardial infarction of unspecified site, Acute subendocardial myocardial infarction, Acute myocardial infarction, unspecified, Subsequent myocardial infarction, Subsequent myocardial infarction of anterior wall, Subsequent myocardial infarction of inferior wall, Subsequent myocardial infarction of other sites, Subsequent myocardial infarction of unspecified site, Certain current complications following acute myocardial infarction, Hemopericardium as current complication following acute myocardial infarction, Atrial septal defect as current                                                                                           |

| Phenotype             | Data fields                      | Field names                                                                                                                                           | Data codes                                                                                                                                                                                                                                  | Data code definitions                                                                                                                                                                                                                                                                                                                                                                                                                                                                                                                                                                                                                                                                                                                                                                                                                                                                                                                                                                                                                                                                                                                                                                                                                                                                                                                                                         |
|-----------------------|----------------------------------|-------------------------------------------------------------------------------------------------------------------------------------------------------|---------------------------------------------------------------------------------------------------------------------------------------------------------------------------------------------------------------------------------------------|-------------------------------------------------------------------------------------------------------------------------------------------------------------------------------------------------------------------------------------------------------------------------------------------------------------------------------------------------------------------------------------------------------------------------------------------------------------------------------------------------------------------------------------------------------------------------------------------------------------------------------------------------------------------------------------------------------------------------------------------------------------------------------------------------------------------------------------------------------------------------------------------------------------------------------------------------------------------------------------------------------------------------------------------------------------------------------------------------------------------------------------------------------------------------------------------------------------------------------------------------------------------------------------------------------------------------------------------------------------------------------|
|                       |                                  |                                                                                                                                                       | I23.6, I23.8, I24.1, I25.2                                                                                                                                                                                                                  | complication following acute myocardial infarction, Ventricular septal defect as current complication following acute myocardial infarction, Rupture of cardiac wall without hemopericardium as current complication following acute myocardial infarction, Rupture of chordae tendinae as current complication following acute myocardial infarction, Rupture of papillary muscle as current complication following acute myocardial infarction, Thrombosis of atrium, auricular appendage, and ventricle as current complication following acute myocardial infarction, Other current complications following acute myocardial infarction, Dressler's Syndrome, Old myocardial infarction                                                                                                                                                                                                                                                                                                                                                                                                                                                                                                                                                                                                                                                                                   |
| Myocardial infarction | 41203<br>41205                   | Diagnosis - main ICD9<br>Diagnoses - secondary ICD9                                                                                                   | 410, 410.0, 410.1, 410.2, 410.3, 410.4, 410.5, 410.6, 410.7, 410.8, 410.9, 411, 411.0, 411.1, 411.8, 412, 412.9, 429.79                                                                                                                     | Myocardial infarction, Acute myocardial infarction of other anterior wall, episode of care unspecified, Acute myocardial infarction of inferolateral wall, episode of care unspecified, Acute myocardial infarction of inferoposterior wall, episode of care unspecified, Acute myocardial infarction of other inferior wall, episode of care unspecified, Acute myocardial infarction of other lateral wall, episode of care unspecified, True posterior wall infarction, episode of care unspecified, Subendocardial infarction, episode of care unspecified, Acute myocardial infarction of other specified sites, episode of care unspecified, Acute myocardial infarction of unspecified site, episode of care unspecified, Postmyocardial infarction syndrome, Intermediate coronary syndrome, Other acute and subacute complications of ischemic heart disease, Old myocardial infarction, Ill-defined descriptions and complications of heart disease, other                                                                                                                                                                                                                                                                                                                                                                                                          |
| Stroke                | 20002                            | Non-cancer illness code, self-reported                                                                                                                | 1081, 1086, 1491, 1583                                                                                                                                                                                                                      | Stroke, subarachnoid hemorrhage, brain hemorrhage, ischemic stroke                                                                                                                                                                                                                                                                                                                                                                                                                                                                                                                                                                                                                                                                                                                                                                                                                                                                                                                                                                                                                                                                                                                                                                                                                                                                                                            |
| Stroke                | 41203<br>41205                   | Diagnosis - main ICD9<br>Diagnoses - secondary ICD9                                                                                                   | 430.0, 430.1, 430.9, 431.0, 431.1, 431.9, 434.0, 434.1, 434.9, 436.0, 436.1, 436.9                                                                                                                                                          | Subarachnoid hemorrhage, intracerebral hemorrhage, occlusion of cerebral arteries, cerebral thrombosis, cerebral embolism, cerebral artery occlusion, unspecified, acute, but ill-defined, cerebrovascular disease                                                                                                                                                                                                                                                                                                                                                                                                                                                                                                                                                                                                                                                                                                                                                                                                                                                                                                                                                                                                                                                                                                                                                            |
| Stroke                | 41202<br>41204<br>40001<br>40002 | Diagnoses - main ICD10<br>Diagnoses – secondary ICD10<br>Underlying (primary) cause of death: ICD10<br>Contributory (secondary) cause of death: ICD10 | I60, I60.0, I60.1, I60.2, I60.3, I60.4, I60.5, I60.6, I60.7, I60.8, I60.9, I61, I61.0, I61.1, I61.2, I61.3, I61.4, I61.5, I61.6, I61.8, I61.9, I63, I63.0, I63.1, I63.2, I63.3, I63.4, I63.5, I63.6, I63.8, I63.9, I64, I64.0, I64.1, I64.9 | Subarachnoid hemorrhage, subarachnoid hemorrhage from carotid siphon and bifurcation, subarachnoid hemorrhage from middle cerebral artery, subarachnoid hemorrhage from anterior communicating artery, subarachnoid hemorrhage from posterior communicating artery, subarachnoid hemorrhage from basilar artery, subarachnoid hemorrhage from vertebral artery, subarachnoid hemorrhage from other intracranial arteries, subarachnoid hemorrhage from intracranial artery, unspecified, other subarachnoid hemorrhage, subarachnoid hemorrhage, unspecified, intracerebral hemorrhage, intracerebral hemorrhage in hemisphere, subcortical, intracerebral hemorrhage in hemisphere, cortical, intracerebral hemorrhage in hemisphere, unspecified, intracerebral hemorrhage in brain stem, intracerebral hemorrhage in cerebellum, intracerebral hemorrhage, intraventricular, intracerebral hemorrhage multiple localized, other intracerebral hemorrhage, intracerebral hemorrhage, unspecified, cerebral infarction, cerebral infarction due to thrombosis of precerebral arteries, cerebral infarction due to embolism of precerebral arteries, cerebral infarction due to unspecified occlusion or stenosis of precerebral arteries, cerebral infarction due to embolism of cerebral arteries, cerebral infarction due to unspecified occlusion or stenosis of cerebral |

| Phenotype                                                                                                                                                                                                                           | Data fields | Field names | Data codes | Data code definitions                                                                                                                                                                         |
|-------------------------------------------------------------------------------------------------------------------------------------------------------------------------------------------------------------------------------------|-------------|-------------|------------|-----------------------------------------------------------------------------------------------------------------------------------------------------------------------------------------------|
|                                                                                                                                                                                                                                     |             |             |            | arteries, cerebral infarction due to cerebral venous thrombosis, nonpyogenic, other cerebral infarction, cerebral infarction, unspecified, stroke, not specified as hemorrhagic or infarction |
| *Listed Phecode <sup>4</sup> definitions comprise 26,897 unique ICD-9 and ICD-10 codes. Mapping from Phecodes to ICD codes can be found at ( <a href="https://phewascatalog.org/phecodes">https://phewascatalog.org/phecodes</a> ). |             |             |            |                                                                                                                                                                                               |



**eTable 2.** Covariate definitions

| Covariate                  | UK Biobank Field ID(s)                                                       | UK Biobank Field Name(s)                                                                                                                                                                                                                                                                                                                                                                                                                                                                                                   | Instance(s)       | Coding                                        | Notes                                                                                                                                                                                                                                                                                                                                     |
|----------------------------|------------------------------------------------------------------------------|----------------------------------------------------------------------------------------------------------------------------------------------------------------------------------------------------------------------------------------------------------------------------------------------------------------------------------------------------------------------------------------------------------------------------------------------------------------------------------------------------------------------------|-------------------|-----------------------------------------------|-------------------------------------------------------------------------------------------------------------------------------------------------------------------------------------------------------------------------------------------------------------------------------------------------------------------------------------------|
| <i>Primary model</i>       |                                                                              |                                                                                                                                                                                                                                                                                                                                                                                                                                                                                                                            |                   |                                               |                                                                                                                                                                                                                                                                                                                                           |
| Age                        | 21022                                                                        | Age                                                                                                                                                                                                                                                                                                                                                                                                                                                                                                                        | 0                 | Continuous age in years                       | Age calculated at end of accelerometer wear                                                                                                                                                                                                                                                                                               |
| Sex                        | 31                                                                           | Sex                                                                                                                                                                                                                                                                                                                                                                                                                                                                                                                        | 0                 | 1) Male<br>2) Female                          |                                                                                                                                                                                                                                                                                                                                           |
| Ethnic background*         | 21000                                                                        | Ethnic background                                                                                                                                                                                                                                                                                                                                                                                                                                                                                                          | 0                 | 1) White<br>2) Black<br>3) Asian<br>4) Other  | Response 5 ( <i>Chinese</i> ) included under category Asian. Responses 2 ( <i>Mixed</i> ) and 6 ( <i>Other ethnic group</i> ) combined into category Other given low frequency                                                                                                                                                            |
| Tobacco use*               | 20116                                                                        | Smoking status                                                                                                                                                                                                                                                                                                                                                                                                                                                                                                             | 0, 1 <sup>†</sup> | 1) Current<br>2) Previous<br>3) Never         |                                                                                                                                                                                                                                                                                                                                           |
| Townsend deprivation index | 22189                                                                        | Townsend deprivation index at recruitment                                                                                                                                                                                                                                                                                                                                                                                                                                                                                  | 0                 | Continuous scale                              |                                                                                                                                                                                                                                                                                                                                           |
| Alcohol use*               | 1558, 1568, 1578, 1588, 1598, 1608, 4407, 4418, 4429, 4440, 4451, 4462, 5364 | Alcohol intake frequency, average weekly red wine intake, average weekly champagne plus white wine intake, average weekly beer plus cider intake, average weekly spirits intake, average weekly fortified wine intake, average weekly intake of other alcoholic drinks, average monthly red wine intake, average monthly champagne plus white wine intake, average monthly beer plus cider intake, average monthly spirits intake, average monthly fortified wine intake, average monthly intake of other alcoholic drinks | 0, 1 <sup>†</sup> | Continuous alcohol consumption in g/week      | Responses to alcohol intake frequency and quantity questionnaires were converted to alcohol intake in grams/week (see Halford et al. <sup>5</sup> )<br><br>In 10.8% of individuals reporting alcohol intake frequency without specifying a number of drinks, the median number of drinks observed at the specified frequency was assumed. |
| Diet quality*              | 1289, 1299, 1309, 1319, 1369, 1379, 1389, 1349, 1478                         |                                                                                                                                                                                                                                                                                                                                                                                                                                                                                                                            | 0, 1 <sup>†</sup> | 1) Healthy<br>2) Intermediate<br>3) Unhealthy | Diet quality categorized as follows (see Bhattacharya et al. <sup>6</sup> ):<br>- Unhealthy: a) below-median intake of fruits and vegetables and b) above-median intake of red meat or processed meat or above-median frequency of adding salt to their diet<br>- Healthy: a) above-median intake or fruits and vegetables and b) below-  |

| Covariate                                                | UK Biobank Field ID(s) | UK Biobank Field Name(s)                                | Instance(s) | Coding                                                               | Notes                                                                                                                                                                                                                                                                                                                                                                                                                                                                                                                                                                                                                                                                                                                                    |
|----------------------------------------------------------|------------------------|---------------------------------------------------------|-------------|----------------------------------------------------------------------|------------------------------------------------------------------------------------------------------------------------------------------------------------------------------------------------------------------------------------------------------------------------------------------------------------------------------------------------------------------------------------------------------------------------------------------------------------------------------------------------------------------------------------------------------------------------------------------------------------------------------------------------------------------------------------------------------------------------------------------|
|                                                          |                        |                                                         |             |                                                                      | <p>median intake of red meat or processed meat and below-median frequency of adding salt to their diet</p> <ul style="list-style-type: none"> <li>- Intermediate: not classified as healthy or unhealthy</li> </ul>                                                                                                                                                                                                                                                                                                                                                                                                                                                                                                                      |
| Educational attainment*                                  | 845, 6138              | Age completed full time education, qualifications       | 0, 1†       | Continuous educational attainment in years                           | <p>Degree/qualification status and reported age completed full time education were converted to years of educational attainment as follows (see Okbay et al.<sup>7</sup>):</p> <ul style="list-style-type: none"> <li>- College or university degree: 20</li> <li>- Advanced Subsidiary/Advanced Levels or equivalent: 13</li> <li>- Ordinary Levels/General Certificate of Secondary Education or equivalent: 10</li> <li>- Certificate of Secondary Education or equivalent: 10</li> <li>- National Vocational Qualification or Higher National Diploma or Higher National Certificate or equivalent: Age completed full time education – 5</li> <li>- Other professional qualification: 15</li> <li>- None of the above: 7</li> </ul> |
| Self-reported health*                                    | 2178                   | Overall health rating                                   | 0, 1†       | <p>1) Excellent<br/>2) Good<br/>3) Fair<br/>4) Poor</p>              |                                                                                                                                                                                                                                                                                                                                                                                                                                                                                                                                                                                                                                                                                                                                          |
| Employment status*                                       | 6142                   | Current employment status                               | 0, 1†       | <p>1) Paid employment/Self-employed<br/>2) Retired or unemployed</p> | <i>In paid employment or self-employed</i> coded as Paid employment/Self-employed, all other answers coded as Retired or unemployed                                                                                                                                                                                                                                                                                                                                                                                                                                                                                                                                                                                                      |
| <i>Additional covariates included in secondary model</i> |                        |                                                         |             |                                                                      |                                                                                                                                                                                                                                                                                                                                                                                                                                                                                                                                                                                                                                                                                                                                          |
| Body mass index                                          | 21001                  | Body mass index                                         | 0, 1†       | Continuous in kg/m <sup>2</sup>                                      |                                                                                                                                                                                                                                                                                                                                                                                                                                                                                                                                                                                                                                                                                                                                          |
| Systolic blood pressure                                  | 4080, 93               | Systolic blood pressure                                 | 0, 1†       | Continuous in mmHg                                                   |                                                                                                                                                                                                                                                                                                                                                                                                                                                                                                                                                                                                                                                                                                                                          |
| Diastolic blood pressure                                 | 4079, 94               | Diastolic blood pressure                                | 0, 1†       | Continuous in mmHg                                                   |                                                                                                                                                                                                                                                                                                                                                                                                                                                                                                                                                                                                                                                                                                                                          |
| Anti-hypertensive medication use*                        | 6153, 6177             | Medication for cholesterol, blood pressure, or diabetes | 0, 1†       | Yes, no                                                              | Positive response to <i>blood pressure medication</i> use coded as Yes                                                                                                                                                                                                                                                                                                                                                                                                                                                                                                                                                                                                                                                                   |

| Covariate | UK Biobank Field ID(s)                                                   | UK Biobank Field Name(s)                                                                                                                                                                                                                                                                                                                                                                     | Instance(s)             | Coding  | Notes                                                                           |
|-----------|--------------------------------------------------------------------------|----------------------------------------------------------------------------------------------------------------------------------------------------------------------------------------------------------------------------------------------------------------------------------------------------------------------------------------------------------------------------------------------|-------------------------|---------|---------------------------------------------------------------------------------|
| Diabetes  | 2443, 20002, 2986, 6177, 6153, 40001, 40002, 41202, 41203, 41204, 41205, | Diabetes diagnosed by doctor, Non-cancer illness code, self-reported, Started insulin use within one year diagnosis of diabetes, Medication for cholesterol, blood pressure, or diabetes, Underlying (primary) cause of death: ICD10, Contributing (secondary) cause of death: ICD10, Diagnoses – main ICD10, Diagnoses – main ICD9, Diagnoses – secondary ICD10, Diagnoses – secondary ICD9 | 0, 1† and hospital data | Yes, no | Please see <b>eTable 1</b> for specific diagnoses codes used to define diabetes |

\*Responses *Do not know* and *Prefer not to answer* considered non-informative (i.e., missing)

†Instance 0 = baseline assessment (3/2006-10/2010), Instance 1 = first follow-up assessment (12/2009-6/2013). Priority was given to Instance 1 data when available given closer temporal proximity before accelerometry

**eTable 3.** Sample characteristics stratified at the median activity threshold of  $\geq 230.4$  minutes of MVPA per week (sample median)

| Baseline Characteristic                                     | Active-WW <sup>a</sup><br>(n=26,473) | Active-Regular <sup>a</sup><br>(n=18,944) | Inactive <sup>a</sup><br>(n=44,156) |
|-------------------------------------------------------------|--------------------------------------|-------------------------------------------|-------------------------------------|
| <i>Mean (SD), median (quartile 1, quartile 3), or N (%)</i> |                                      |                                           |                                     |
| Age                                                         | 62.2 (7.7)                           | 61.1 (7.9)                                | 63.0 (7.9)                          |
| Sex                                                         |                                      |                                           |                                     |
| Female                                                      | 12,481 (47.2%)                       | 9,371 (49.5%)                             | 28,617 (64.8%)                      |
| Male                                                        | 13,992 (52.9%)                       | 9,573 (50.5%)                             | 15,539 (35.2%)                      |
| Ethnic background <sup>b</sup>                              |                                      |                                           |                                     |
| Asian                                                       | 209 (0.8%)                           | 222 (1.2%)                                | 594 (1.3%)                          |
| Black                                                       | 145 (0.5%)                           | 144 (0.8%)                                | 440 (1.0%)                          |
| Mixed                                                       | 125 (0.5%)                           | 113 (0.6%)                                | 249 (0.6%)                          |
| Other                                                       | 129 (0.5%)                           | 128 (0.7%)                                | 206 (0.5%)                          |
| White                                                       | 25,865 (97.7%)                       | 18,337 (96.8%)                            | 42,667 (96.6%)                      |
| Tobacco use                                                 |                                      |                                           |                                     |
| Never                                                       | 15,708 (59.3%)                       | 10,962 (57.9%)                            | 24,739 (56.0%)                      |
| Former                                                      | 9,366 (35.4%)                        | 6,870 (36.3%)                             | 15,965 (36.2%)                      |
| Current                                                     | 1,399 (5.3%)                         | 1,112 (5.9%)                              | 3,452 (7.8%)                        |
| Alcohol intake (g/week) <sup>c</sup>                        | 104 (32, 192)                        | 96 (32, 192)                              | 80 (8, 160)                         |
| Townsend Deprivation Index <sup>d</sup>                     | -2.0 (2.7)                           | -1.3 (3.0)                                | -1.8 (2.8)                          |
| Educational attainment (years)                              | 15.8 (4.6)                           | 16.0 (4.6)                                | 14.6 (4.7)                          |
| Employed                                                    | 16,399 (61.9%)                       | 12,639 (66.7%)                            | 25,259 (57.2%)                      |
| Self-reported health                                        |                                      |                                           |                                     |
| Good                                                        | 16,012 (60.5%)                       | 11,327 (59.8%)                            | 26,397 (59.8%)                      |
| Excellent                                                   | 7,073 (26.7%)                        | 5,069 (26.8%)                             | 7,194 (16.3%)                       |
| Fair                                                        | 3,061 (11.6%)                        | 2,278 (12.0%)                             | 8,827 (20.0%)                       |
| Poor                                                        | 327 (1.2%)                           | 270 (1.4%)                                | 1,738 (3.9%)                        |
| Diet quality                                                |                                      |                                           |                                     |
| Intermediate                                                | 24,554 (50.0%)                       | 9,481 (50.0%)                             | 9,110 (50.0%)                       |
| Poor                                                        | 16,811 (34.2%)                       | 5,603 (29.6%)                             | 5,200 (28.5%)                       |
| Good                                                        | 7,726 (15.7%)                        | 3,860 (20.4%)                             | 3,909 (21.5%)                       |
| Anti-hypertensive medication use <sup>#</sup>               | 3,766 (14.2%)                        | 2,465 (13.0%)                             | 9,353 (21.1%)                       |
| Body mass index (kg/m <sup>2</sup> ) <sup>#</sup>           | 25.9 (3.8)                           | 25.6 (3.9)                                | 27.6 (5.0)                          |
| Body mass index > 20 kg/m <sup>2</sup>                      | 11,464 (13.3%)                       | 2,371 (12.5%)                             | 11,464 (26.0%)                      |
| Systolic blood pressure (mmHg) <sup>#</sup>                 | 136 (18)                             | 135 (18)                                  | 137 (18)                            |

|                                                                                                                                                                                                                                                                                                                                                                                                                                                                                                                                                                                                                                                                                                                                                                                                                                                                                                                 |                   |                  |                   |
|-----------------------------------------------------------------------------------------------------------------------------------------------------------------------------------------------------------------------------------------------------------------------------------------------------------------------------------------------------------------------------------------------------------------------------------------------------------------------------------------------------------------------------------------------------------------------------------------------------------------------------------------------------------------------------------------------------------------------------------------------------------------------------------------------------------------------------------------------------------------------------------------------------------------|-------------------|------------------|-------------------|
| Systolic blood pressure > 140 mmHg                                                                                                                                                                                                                                                                                                                                                                                                                                                                                                                                                                                                                                                                                                                                                                                                                                                                              | 10,132<br>(38.3%) | 6,856<br>(36.2%) | 17,968<br>(40.7%) |
| Diastolic blood pressure (mmHg) <sup>#</sup>                                                                                                                                                                                                                                                                                                                                                                                                                                                                                                                                                                                                                                                                                                                                                                                                                                                                    | 81 (10)           | 81 (10)          | 82 (10)           |
| Diastolic blood pressure > 90 mmHg                                                                                                                                                                                                                                                                                                                                                                                                                                                                                                                                                                                                                                                                                                                                                                                                                                                                              | 4,796<br>(18.1%)  | 3,363<br>(17.8%) | 8,660<br>(19.6%)  |
| Diabetes                                                                                                                                                                                                                                                                                                                                                                                                                                                                                                                                                                                                                                                                                                                                                                                                                                                                                                        | 535 (2.0%)        | 382 (2.0%)       | 2,063 (4.7%)      |
| <p>a- Inactive defined as MVPA below the sample median (230.4 minutes of MVPA/week)</p> <p>b- Represents self-reported "ethnic background." Race classification of "Other" defined as self-report of a race other than Asian, Black, Mixed, or White.</p> <p>c- Can be converted to standard US drinks per week by dividing by 14g</p> <p>d- The Townsend Deprivation Index is a measure of material deprivation standardized by geographic area. Numerically greater values indicate more deprivation. The sample range is -6.2 to 10.1, with values around -2 and -1 indicating somewhat less deprivation compared to average based on geographic location.</p> <p>e- Indicates covariates which may lie on the causal pathway between physical activity and cardiovascular events and are included only in a secondary additionally adjusted model (see <b>eTable 9</b>).</p> <p>SD = standard deviation</p> |                   |                  |                   |

**eTable 4.** Sample characteristics of individuals in primary analysis sample versus individuals excluded for incomplete accelerometer data

| Baseline Characteristic                                     | Primary sample<br>(n=89,573) | Incomplete data<br>(n=3,925) |
|-------------------------------------------------------------|------------------------------|------------------------------|
| <i>Mean (SD), median (quartile 1, quartile 3), or N (%)</i> |                              |                              |
| Age                                                         | 62.3 (7.8)                   | 62.7 (7.9)                   |
| Sex                                                         |                              |                              |
| Female                                                      | 50,469 (56.3%)               | 2,219 (56.5%)                |
| Male                                                        | 39,104 (43.7%)               | 1,706 (43.5%)                |
| Ethnic background <sup>a</sup>                              |                              |                              |
| Asian                                                       | 1,025 (1.1%)                 | 41 (1.0%)                    |
| Black                                                       | 729 (0.8%)                   | 31 (0.8%)                    |
| Mixed                                                       | 487 (0.5%)                   | 0 (0%)                       |
| Other                                                       | 463 (0.5%)                   | 41 (1.0%)                    |
| White                                                       | 86,869 (97.0%)               | 3,812 (97.1%)                |
| Smoking status                                              |                              |                              |
| Never                                                       | 51,409 (57.4%)               | 2,212 (56.4%)                |
| Former                                                      | 32,201 (36.0%)               | 1,446 (36.8%)                |
| Current                                                     | 5,963 (6.7%)                 | 267 (6.8%)                   |
| Alcohol intake (g/week) <sup>b</sup>                        | 96 (32, 192)                 | 96 (16, 176)                 |
| Townsend Deprivation Index <sup>c</sup>                     | -1.7 (2.8)                   | -1.7 (2.8)                   |
| Educational attainment (years)                              | 15.3 (4.7)                   | 15.2 (4.7)                   |
| Employed                                                    | 54,297 (60.6%)               | 2,321 (59.1%)                |
| Self-reported health                                        |                              |                              |
| Good                                                        | 53,736 (60.0%)               | 2,384 (60.7%)                |
| Excellent                                                   | 19,336 (21.6%)               | 810 (20.6%)                  |
| Fair                                                        | 14,166 (15.8%)               | 620 (15.8%)                  |
| Poor                                                        | 2,335 (2.6%)                 | 111 (2.8%)                   |
| Diet quality                                                |                              |                              |
| Intermediate                                                | 44,894 (50.1%)               | 1,977 (50.4%)                |
| Poor                                                        | 28,791 (32.1%)               | 1,229 (31.3%)                |
| Good                                                        | 15,888 (17.7%)               | 719 (18.3%)                  |
| Anti-hypertensive medication use <sup>d</sup>               | 15,584 (17.4%)               | 755 (19.2%)                  |
| Body mass index (kg/m <sup>2</sup> ) <sup>d</sup>           | 26.7 (4.5)                   | 26.7 (4.5)                   |
| Body mass index > 30 kg/m <sup>2</sup>                      | 17,346 (19.4%)               | 745 (19.0%)                  |
| Systolic blood pressure (mmHg) <sup>d</sup>                 | 137 (18)                     | 136 (18)                     |
| Systolic blood pressure > 140 mmHg                          | 34,957 (39.1%)               | 1,486 (37.9%)                |
| Diastolic blood pressure (mmHg) <sup>d</sup>                | 82 (10)                      | 81 (10)                      |

|                                                                                                                                                                                                                                                                                                                                                                                                                                                                                                                                                                                                                                                                                                                                                                                                                         |                |             |
|-------------------------------------------------------------------------------------------------------------------------------------------------------------------------------------------------------------------------------------------------------------------------------------------------------------------------------------------------------------------------------------------------------------------------------------------------------------------------------------------------------------------------------------------------------------------------------------------------------------------------------------------------------------------------------------------------------------------------------------------------------------------------------------------------------------------------|----------------|-------------|
| Diastolic blood pressure > 90 mmHg                                                                                                                                                                                                                                                                                                                                                                                                                                                                                                                                                                                                                                                                                                                                                                                      | 16,819 (18.8%) | 709 (18.1%) |
| Diabetes                                                                                                                                                                                                                                                                                                                                                                                                                                                                                                                                                                                                                                                                                                                                                                                                                | 2,980 (3.3%)   | 123 (3.1%)  |
| <p>a- Represents self-reported "ethnic background." Race classification of "Other" defined as self-report of a race other than Asian, Black, Mixed, or White.</p> <p>b- Can be converted to standard US drinks per week by dividing by 14g</p> <p>c- The Townsend Deprivation Index is a measure of material deprivation standardized by geographic area. Numerically greater values indicate more deprivation. The sample range is -6.2 to 10.1, with values around -2 and -1 indicating somewhat less deprivation compared to average based on geographic location.</p> <p>d- Indicates covariates which may lie on the causal pathway between physical activity and cardiovascular events and are included only in a secondary additionally adjusted model (see <b>eTable 9</b>).</p> <p>SD = standard deviation</p> |                |             |

**eTable 5.** Associations between physical activity pattern and incident cardiovascular disease across varying MVPA thresholds

| Activity Pattern                                                                                                                                                                                                                                                                                                                                                                                                                                                                                                                                                                                                                                                                                                                                                                                                                                                                                                                                                                                                                     | Atrial fibrillation <sup>a</sup><br>(n=87,034) |                                 |                                | Myocardial infarction <sup>a</sup><br>(n=87,484) |                                 |                                | Heart failure <sup>a</sup><br>(n=88,871) |                                 |                                | Stroke <sup>a</sup><br>(n=88,308)     |                                 |                                |
|--------------------------------------------------------------------------------------------------------------------------------------------------------------------------------------------------------------------------------------------------------------------------------------------------------------------------------------------------------------------------------------------------------------------------------------------------------------------------------------------------------------------------------------------------------------------------------------------------------------------------------------------------------------------------------------------------------------------------------------------------------------------------------------------------------------------------------------------------------------------------------------------------------------------------------------------------------------------------------------------------------------------------------------|------------------------------------------------|---------------------------------|--------------------------------|--------------------------------------------------|---------------------------------|--------------------------------|------------------------------------------|---------------------------------|--------------------------------|---------------------------------------|---------------------------------|--------------------------------|
|                                                                                                                                                                                                                                                                                                                                                                                                                                                                                                                                                                                                                                                                                                                                                                                                                                                                                                                                                                                                                                      | Hazard ratio<br>(95% CI) <sup>b</sup>          | E <sub>point</sub> <sup>c</sup> | E <sub>null</sub> <sup>c</sup> | Hazard ratio<br>(95% CI) <sup>b</sup>            | E <sub>point</sub> <sup>c</sup> | E <sub>null</sub> <sup>c</sup> | Hazard ratio<br>(95% CI) <sup>b</sup>    | E <sub>point</sub> <sup>c</sup> | E <sub>null</sub> <sup>c</sup> | Hazard ratio<br>(95% CI) <sup>b</sup> | E <sub>point</sub> <sup>c</sup> | E <sub>null</sub> <sup>c</sup> |
| <b>Activity threshold: 25<sup>th</sup> percentile (≥115.2 minutes MVPA/week)<sup>d</sup></b>                                                                                                                                                                                                                                                                                                                                                                                                                                                                                                                                                                                                                                                                                                                                                                                                                                                                                                                                         |                                                |                                 |                                |                                                  |                                 |                                |                                          |                                 |                                |                                       |                                 |                                |
| Inactive (n=21,614) <sup>e</sup>                                                                                                                                                                                                                                                                                                                                                                                                                                                                                                                                                                                                                                                                                                                                                                                                                                                                                                                                                                                                     | 1.00 (0.93-1.08)                               | 1.00                            | 1.00                           | 1.00 (0.90-1.11)                                 | 1.00                            | 1.00                           | 1.00 (0.91-1.10)                         | 1.00                            | 1.00                           | 1.00 (0.88-1.13)                      | 1.00                            | 1.00                           |
| Weekend warrior (n=45,738) <sup>e</sup>                                                                                                                                                                                                                                                                                                                                                                                                                                                                                                                                                                                                                                                                                                                                                                                                                                                                                                                                                                                              | 0.79 (0.75-0.84)                               | 1.85                            | 1.67                           | 0.72 (0.66-0.78)                                 | 2.12                            | 1.88                           | 0.63 (0.58-0.68)                         | 2.55                            | 2.30                           | 0.76 (0.69-0.84)                      | 1.96                            | 1.67                           |
| Regular activity (n=22,221) <sup>e</sup>                                                                                                                                                                                                                                                                                                                                                                                                                                                                                                                                                                                                                                                                                                                                                                                                                                                                                                                                                                                             | 0.79 (0.73-0.86)                               | 1.85                            | 1.60                           | 0.64 (0.56-0.72)                                 | 2.50                            | 2.12                           | 0.63 (0.55-0.71)                         | 2.55                            | 2.17                           | 0.79 (0.68-0.91)                      | 1.85                            | 1.77                           |
| <b>Activity threshold: Guideline-based (≥150 minutes MVPA/week)<sup>d</sup></b>                                                                                                                                                                                                                                                                                                                                                                                                                                                                                                                                                                                                                                                                                                                                                                                                                                                                                                                                                      |                                                |                                 |                                |                                                  |                                 |                                |                                          |                                 |                                |                                       |                                 |                                |
| Inactive (n=30,228) <sup>e</sup>                                                                                                                                                                                                                                                                                                                                                                                                                                                                                                                                                                                                                                                                                                                                                                                                                                                                                                                                                                                                     | 1.00 (0.94-1.07)                               | 1.00                            | 1.00                           | 1.00 (0.91-1.10)                                 | 1.00                            | 1.00                           | 1.00 (0.92-1.09)                         | 1.00                            | 1.00                           | 1.00 (0.90-1.11)                      | 1.00                            | 1.00                           |
| Weekend warrior (n=37,872) <sup>e</sup>                                                                                                                                                                                                                                                                                                                                                                                                                                                                                                                                                                                                                                                                                                                                                                                                                                                                                                                                                                                              | 0.78 (0.74-0.83)                               | 1.88                            | 1.70                           | 0.73 (0.67-0.80)                                 | 2.08                            | 1.81                           | 0.62 (0.56-0.68)                         | 2.61                            | 2.30                           | 0.79 (0.71-0.88)                      | 1.85                            | 1.53                           |
| Regular activity (n=21,473) <sup>e</sup>                                                                                                                                                                                                                                                                                                                                                                                                                                                                                                                                                                                                                                                                                                                                                                                                                                                                                                                                                                                             | 0.81 (0.74-0.88)                               | 1.77                            | 1.53                           | 0.65 (0.57-0.74)                                 | 2.45                            | 2.04                           | 0.64 (0.56-0.73)                         | 2.50                            | 2.08                           | 0.83 (0.72-0.97)                      | 1.70                            | 1.21                           |
| <b>Activity threshold: 50<sup>th</sup> percentile (≥230.4 minutes MVPA/week)<sup>d</sup></b>                                                                                                                                                                                                                                                                                                                                                                                                                                                                                                                                                                                                                                                                                                                                                                                                                                                                                                                                         |                                                |                                 |                                |                                                  |                                 |                                |                                          |                                 |                                |                                       |                                 |                                |
| Inactive (n=44,156) <sup>e</sup>                                                                                                                                                                                                                                                                                                                                                                                                                                                                                                                                                                                                                                                                                                                                                                                                                                                                                                                                                                                                     | 1.00 (0.95-1.06)                               | 1.00                            | 1.00                           | 1.00 (0.92-1.08)                                 | 1.00                            | 1.00                           | 1.00 (0.93-1.08)                         | 1.00                            | 1.00                           | 1.00 (0.90-1.11)                      | 1.00                            | 1.00                           |
| Weekend warrior (n=26,473) <sup>e</sup>                                                                                                                                                                                                                                                                                                                                                                                                                                                                                                                                                                                                                                                                                                                                                                                                                                                                                                                                                                                              | 0.82 (0.76-0.88)                               | 1.74                            | 1.53                           | 0.77 (0.69-0.86)                                 | 1.92                            | 1.60                           | 0.68 (0.61-0.77)                         | 2.30                            | 1.92                           | 0.89 (0.79-1.02)                      | 1.50                            | 1.00                           |
| Regular activity (n=18,944) <sup>e</sup>                                                                                                                                                                                                                                                                                                                                                                                                                                                                                                                                                                                                                                                                                                                                                                                                                                                                                                                                                                                             | 0.84 (0.76-0.91)                               | 1.67                            | 1.43                           | 0.72 (0.62-0.82)                                 | 2.12                            | 1.74                           | 0.68 (0.59-0.79)                         | 2.30                            | 1.85                           | 0.87 (0.74-1.02)                      | 1.56                            | 1.00                           |
| <b>Activity threshold: 75<sup>th</sup> percentile (≥403.2 minutes MVPA/week)<sup>d</sup></b>                                                                                                                                                                                                                                                                                                                                                                                                                                                                                                                                                                                                                                                                                                                                                                                                                                                                                                                                         |                                                |                                 |                                |                                                  |                                 |                                |                                          |                                 |                                |                                       |                                 |                                |
| Inactive (n=66,783) <sup>e</sup>                                                                                                                                                                                                                                                                                                                                                                                                                                                                                                                                                                                                                                                                                                                                                                                                                                                                                                                                                                                                     | 1.00 (0.95-1.05)                               | 1.00                            | 1.00                           | 1.00 (0.93-1.07)                                 | 1.00                            | 1.00                           | 1.00 (0.93-1.07)                         | 1.00                            | 1.00                           | 1.00 (0.92-1.09)                      | 1.00                            | 1.00                           |
| Weekend warrior (n=11,115) <sup>e</sup>                                                                                                                                                                                                                                                                                                                                                                                                                                                                                                                                                                                                                                                                                                                                                                                                                                                                                                                                                                                              | 0.87 (0.78-0.98)                               | 1.56                            | 1.16                           | 0.92 (0.78-1.08)                                 | 1.39                            | 1.00                           | 0.81 (0.67-0.96)                         | 1.77                            | 1.25                           | 0.86 (0.70-1.06)                      | 1.60                            | 1.00                           |
| Regular activity (n=11,675) <sup>e</sup>                                                                                                                                                                                                                                                                                                                                                                                                                                                                                                                                                                                                                                                                                                                                                                                                                                                                                                                                                                                             | 0.82 (0.72-0.92)                               | 1.74                            | 1.39                           | 0.80 (0.67-0.95)                                 | 1.81                            | 1.29                           | 0.75 (0.62-0.90)                         | 2.00                            | 1.46                           | 0.74 (0.59-0.92)                      | 2.04                            | 1.39                           |
| <p>a- Number of events as follows: atrial fibrillation n=2,642, myocardial infarction n=1,229, heart failure n=1,275, stroke n=840</p> <p>b- Hazard ratios obtained using the floating absolute risks method</p> <p>c- E-values estimate the strength of association with exposure and outcome of potential unmeasured confounders required to nullify the observed effect. E<sub>point</sub> denotes E-value for the point estimate and E<sub>null</sub> denotes the E-value for the confidence interval bound closest to the null.</p> <p>d- Inactive defined as weekly MVPA below the specified threshold. All models adjusted for age, sex, race, tobacco use, Townsend Deprivation Index, alcohol use, diet quality, educational attainment, employment status, and self-reported health.</p> <p>e- Subgroup sample sizes reflect the overall sample prior to disease-specific exclusions for prevalent conditions (e.g., prior to removal of prevalent atrial fibrillation for the incident atrial fibrillation analysis).</p> |                                                |                                 |                                |                                                  |                                 |                                |                                          |                                 |                                |                                       |                                 |                                |



**eTable 6.** Associations between physical activity pattern and incident cardiovascular disease using activity threshold of  $\geq 150$  minutes of MVPA per week (guideline-based)

| Activity Pattern                                                                                    | Atrial fibrillation <sup>a</sup><br>(n=87,034) |                                 |                                | Myocardial infarction <sup>a</sup><br>(n=87,484) |                                 |                                | Heart failure <sup>a</sup><br>(n=88,871) |                                 |                                | Stroke <sup>a</sup><br>(n=88,308)     |                                 |                                |
|-----------------------------------------------------------------------------------------------------|------------------------------------------------|---------------------------------|--------------------------------|--------------------------------------------------|---------------------------------|--------------------------------|------------------------------------------|---------------------------------|--------------------------------|---------------------------------------|---------------------------------|--------------------------------|
|                                                                                                     | Hazard ratio<br>(95% CI) <sup>b</sup>          | E <sub>point</sub> <sup>c</sup> | E <sub>null</sub> <sup>c</sup> | Hazard ratio<br>(95% CI) <sup>b</sup>            | E <sub>point</sub> <sup>c</sup> | E <sub>null</sub> <sup>c</sup> | Hazard ratio<br>(95% CI) <sup>b</sup>    | E <sub>point</sub> <sup>c</sup> | E <sub>null</sub> <sup>c</sup> | Hazard ratio<br>(95% CI) <sup>b</sup> | E <sub>point</sub> <sup>c</sup> | E <sub>null</sub> <sup>c</sup> |
| <b>Weekend warrior defined as <math>\geq 50\%</math> MVPA over 1-2 days<sup>d</sup></b>             |                                                |                                 |                                |                                                  |                                 |                                |                                          |                                 |                                |                                       |                                 |                                |
| Inactive (n=30,228) <sup>e</sup>                                                                    | 1.00 (0.94-1.07)                               | 1.00                            | 1.00                           | 1.00 (0.91-1.10)                                 | 1.00                            | 1.00                           | 1.00 (0.92-1.09)                         | 1.00                            | 1.00                           | 1.00 (0.90-1.11)                      | 1.00                            | 1.00                           |
| Weekend warrior (n=37,872) <sup>e</sup>                                                             | 0.78 (0.74-0.83)                               | 1.88                            | 1.70                           | 0.73 (0.67-0.80)                                 | 2.08                            | 1.81                           | 0.62 (0.56-0.68)                         | 2.61                            | 2.30                           | 0.79 (0.71-0.88)                      | 1.85                            | 1.53                           |
| Regular activity (n=21,473) <sup>e</sup>                                                            | 0.81 (0.74-0.88)                               | 1.77                            | 1.53                           | 0.65 (0.57-0.74)                                 | 2.45                            | 2.04                           | 0.64 (0.56-0.73)                         | 2.50                            | 2.08                           | 0.83 (0.72-0.97)                      | 1.70                            | 1.21                           |
| <b>Weekend warrior defined as <math>\geq 75\%</math> MVPA over 1-2 days<sup>d</sup></b>             |                                                |                                 |                                |                                                  |                                 |                                |                                          |                                 |                                |                                       |                                 |                                |
| Inactive (n=30,228) <sup>e</sup>                                                                    | 1.00 (0.94-1.06)                               | 1.00                            | 1.00                           | 1.00 (0.91-1.10)                                 | 1.00                            | 1.00                           | 1.00 (0.92-1.09)                         | 1.00                            | 1.00                           | 1.00 (0.90-1.12)                      | 1.00                            | 1.00                           |
| Weekend warrior (n=6,352) <sup>e</sup>                                                              | 0.77 (0.66-0.89)                               | 1.92                            | 1.50                           | 0.75 (0.61-0.93)                                 | 2.00                            | 1.36                           | 0.53 (0.41-0.68)                         | 3.18                            | 2.30                           | 0.70 (0.53-0.91)                      | 2.21                            | 1.43                           |
| Regular activity (n=52,993) <sup>e</sup>                                                            | 0.79 (0.75-0.84)                               | 1.85                            | 1.67                           | 0.70 (0.64-0.75)                                 | 2.21                            | 2.00                           | 0.64 (0.59-0.69)                         | 2.50                            | 2.26                           | 0.81 (0.74-0.89)                      | 1.77                            | 1.50                           |
| <b>Weekend warrior defined as <math>\geq 50\%</math> MVPA over 1-2 consecutive days<sup>d</sup></b> |                                                |                                 |                                |                                                  |                                 |                                |                                          |                                 |                                |                                       |                                 |                                |
| Inactive (n=30,228) <sup>e</sup>                                                                    | 1.00 (0.94-1.06)                               | 1.00                            | 1.00                           | 1.00 (0.91-1.10)                                 | 1.00                            | 1.00                           | 1.00 (0.92-1.09)                         | 1.00                            | 1.00                           | 1.00 (0.89-1.12)                      | 1.00                            | 1.00                           |
| Weekend warrior (n=25,270) <sup>e</sup>                                                             | 0.80 (0.75-0.87)                               | 1.81                            | 1.56                           | 0.74 (0.66-0.82)                                 | 2.04                            | 1.74                           | 0.62 (0.55-0.70)                         | 2.61                            | 2.21                           | 0.74 (0.56-0.97)                      | 2.04                            | 1.21                           |
| Regular activity (n=34,075) <sup>e</sup>                                                            | 0.78 (0.73-0.84)                               | 1.88                            | 1.67                           | 0.68 (0.61-0.75)                                 | 2.30                            | 2.00                           | 0.62 (0.56-0.69)                         | 2.61                            | 2.26                           | 0.80 (0.71-0.90)                      | 1.81                            | 1.46                           |
| <b>Weekend warrior defined as <math>\geq 50\%</math> MVPA over 1-2 weekend days<sup>d</sup></b>     |                                                |                                 |                                |                                                  |                                 |                                |                                          |                                 |                                |                                       |                                 |                                |
| Inactive (n=30,228) <sup>e</sup>                                                                    | 1.00 (0.94-1.07)                               | 1.00                            | 1.00                           | 1.00 (0.91-1.09)                                 | 1.00                            | 1.00                           | 1.00 (0.92-1.09)                         | 1.00                            | 1.00                           | 1.00 (0.89-1.12)                      | 1.00                            | 1.00                           |
| Weekend warrior (n=7,820) <sup>e</sup>                                                              | 0.81 (0.70-0.94)                               | 1.77                            | 1.32                           | 0.77 (0.63-0.95)                                 | 1.92                            | 1.29                           | 0.67 (0.54-0.85)                         | 2.35                            | 1.63                           | 0.86 (0.66-1.13)                      | 1.60                            | 1.00                           |
| Regular activity (n=51,526) <sup>e</sup>                                                            | 0.79 (0.75-0.83)                               | 1.85                            | 1.70                           | 0.69 (0.64-0.75)                                 | 2.26                            | 2.00                           | 0.62 (0.57-0.67)                         | 2.61                            | 2.35                           | 0.80 (0.73-0.88)                      | 1.81                            | 1.53                           |

a- Number of events as follows: atrial fibrillation n=2,642, myocardial infarction n=1,229, heart failure n=1,275, stroke n=840  
b- Hazard ratios obtained using the floating absolute risks method  
c- E-values estimate the strength of association with exposure and outcome of potential unmeasured confounders required to nullify the observed effect. E<sub>point</sub> denotes E-value for the point estimate and E<sub>null</sub> denotes the E-value for the confidence interval bound closest to the null.  
d- Inactive defined as weekly MVPA below the specified threshold. All models adjusted for age, sex, race, tobacco use, Townsend Deprivation Index, alcohol use, diet quality, educational attainment, employment status, and self-reported health.  
e- Subgroup sample sizes reflect the overall sample prior to disease-specific exclusions for prevalent conditions (e.g., prior to removal of prevalent atrial fibrillation for the incident atrial fibrillation analysis).

**eTable 7.** Associations between physical activity pattern and incident cardiovascular disease using activity threshold of  $\geq 230.4$  minutes of MVPA per week (sample median)

| Activity Pattern                                                                                    | Atrial fibrillation <sup>a</sup><br>(n=87,034) |                                 |                                | Myocardial infarction <sup>a</sup><br>(n=87,484) |                                 |                                | Heart failure <sup>a</sup><br>(n=88,871) |                                 |                                | Stroke <sup>a</sup><br>(n=88,308)     |                                 |                                |
|-----------------------------------------------------------------------------------------------------|------------------------------------------------|---------------------------------|--------------------------------|--------------------------------------------------|---------------------------------|--------------------------------|------------------------------------------|---------------------------------|--------------------------------|---------------------------------------|---------------------------------|--------------------------------|
|                                                                                                     | Hazard ratio<br>(95% CI) <sup>b</sup>          | E <sub>point</sub> <sup>c</sup> | E <sub>null</sub> <sup>c</sup> | Hazard ratio<br>(95% CI) <sup>b</sup>            | E <sub>point</sub> <sup>c</sup> | E <sub>null</sub> <sup>c</sup> | Hazard ratio<br>(95% CI) <sup>b</sup>    | E <sub>point</sub> <sup>c</sup> | E <sub>null</sub> <sup>c</sup> | Hazard ratio<br>(95% CI) <sup>b</sup> | E <sub>point</sub> <sup>c</sup> | E <sub>null</sub> <sup>c</sup> |
| <b>Weekend warrior defined as <math>\geq 50\%</math> MVPA over 1-2 days<sup>d</sup></b>             |                                                |                                 |                                |                                                  |                                 |                                |                                          |                                 |                                |                                       |                                 |                                |
| Inactive (n=44,156) <sup>e</sup>                                                                    | 1.00 (0.95-1.06)                               | 1.00                            | 1.00                           | 1.00 (0.92-1.08)                                 | 1.00                            | 1.00                           | 1.00 (0.93-1.08)                         | 1.00                            | 1.00                           | 1.00 (0.90-1.11)                      | 1.00                            | 1.00                           |
| Weekend warrior (n=26,473) <sup>e</sup>                                                             | 0.82 (0.76-0.88)                               | 1.74                            | 1.53                           | 0.77 (0.69-0.86)                                 | 1.92                            | 1.60                           | 0.68 (0.61-0.77)                         | 2.30                            | 1.92                           | 0.89 (0.79-1.02)                      | 1.50                            | 1.00                           |
| Regular activity (n=18,945) <sup>e</sup>                                                            | 0.84 (0.76-0.91)                               | 1.67                            | 1.43                           | 0.72 (0.62-0.82)                                 | 2.12                            | 1.74                           | 0.68 (0.59-0.79)                         | 2.30                            | 1.85                           | 0.87 (0.74-1.02)                      | 1.56                            | 1.00                           |
| <b>Weekend warrior defined as <math>\geq 75\%</math> MVPA over 1-2 days<sup>d</sup></b>             |                                                |                                 |                                |                                                  |                                 |                                |                                          |                                 |                                |                                       |                                 |                                |
| Inactive (n=44,156) <sup>e</sup>                                                                    | 1.00 (0.95-1.06)                               | 1.00                            | 1.00                           | 1.00 (0.92-1.08)                                 | 1.00                            | 1.00                           | 1.00 (0.93-1.08)                         | 1.00                            | 1.00                           | 1.00 (0.91-1.10)                      | 1.00                            | 1.00                           |
| Weekend warrior (n=3,722) <sup>e</sup>                                                              | 0.93 (0.78-1.10)                               | 1.36                            | 1.00                           | 0.80 (0.61-1.05)                                 | 1.81                            | 1.00                           | 0.66 (0.49-0.89)                         | 2.40                            | 1.50                           | 0.80 (0.56-1.13)                      | 1.81                            | 1.00                           |
| Regular activity (n=41,696) <sup>e</sup>                                                            | 0.81 (0.77-0.86)                               | 1.77                            | 1.60                           | 0.74 (0.68-0.81)                                 | 2.04                            | 1.77                           | 0.69 (0.62-0.76)                         | 2.26                            | 1.96                           | 0.89 (0.80-0.99)                      | 1.50                            | 1.11                           |
| <b>Weekend warrior defined as <math>\geq 50\%</math> MVPA over 1-2 consecutive days<sup>d</sup></b> |                                                |                                 |                                |                                                  |                                 |                                |                                          |                                 |                                |                                       |                                 |                                |
| Inactive (n=44,156) <sup>e</sup>                                                                    | 1.00 (0.95-1.06)                               | 1.00                            | 1.00                           | 1.00 (0.92-1.08)                                 | 1.00                            | 1.00                           | 1.00 (0.93-1.08)                         | 1.00                            | 1.00                           | 1.00 (0.90-1.11)                      | 1.00                            | 1.00                           |
| Weekend warrior (n=16,918) <sup>e</sup>                                                             | 0.86 (0.79-0.95)                               | 1.60                            | 1.29                           | 0.79 (0.69-0.91)                                 | 1.85                            | 1.43                           | 0.73 (0.63-0.84)                         | 2.08                            | 1.67                           | 0.92 (0.78-1.08)                      | 1.39                            | 1.00                           |
| Regular activity (n=28,499) <sup>e</sup>                                                            | 0.80 (0.74-0.86)                               | 1.81                            | 1.60                           | 0.72 (0.64-0.80)                                 | 2.12                            | 1.81                           | 0.66 (0.58-0.74)                         | 2.40                            | 2.04                           | 0.86 (0.71-0.98)                      | 1.96                            | 1.16                           |
| <b>Weekend warrior defined as <math>\geq 50\%</math> MVPA over 1-2 weekend days<sup>d</sup></b>     |                                                |                                 |                                |                                                  |                                 |                                |                                          |                                 |                                |                                       |                                 |                                |
| Inactive (n=44,156) <sup>e</sup>                                                                    | 1.00 (0.95-1.03)                               | 1.00                            | 1.00                           | 1.00 (0.92-1.09)                                 | 1.00                            | 1.00                           | 1.00 (0.92-1.08)                         | 1.00                            | 1.00                           | 1.00 (0.90-1.11)                      | 1.00                            | 1.00                           |
| Weekend warrior (n=5,421) <sup>e</sup>                                                              | 0.86 (0.72-1.03)                               | 1.60                            | 1.00                           | 0.88 (0.69-1.13)                                 | 1.53                            | 1.00                           | 0.76 (0.57-1.01)                         | 1.96                            | 100                            | 1.05 (0.77-1.42)                      | 1.28                            | 1.00                           |
| Regular activity (n=39,997) <sup>e</sup>                                                            | 0.75 (0.71-0.80)                               | 2.00                            | 1.81                           | 0.73 (0.67-0.80)                                 | 2.08                            | 1.81                           | 0.68 (0.62-0.74)                         | 2.30                            | 2.04                           | 0.87 (0.78-0.96)                      | 1.56                            | 1.25                           |

a- Number of events as follows: atrial fibrillation n=2,642, myocardial infarction n=1,229, heart failure n=1,275, stroke n=840  
b- Hazard ratios obtained using the floating absolute risks method  
c- E-values estimate the strength of association with exposure and outcome of potential unmeasured confounders required to nullify the observed effect. E<sub>point</sub> denotes E-value for the point estimate and E<sub>null</sub> denotes the E-value for the confidence interval bound closest to the null.  
d- Inactive defined as weekly MVPA below the specified threshold. All models adjusted for age, sex, race, tobacco use, Townsend Deprivation Index, alcohol use, diet quality, educational attainment, employment status, and self-reported health.  
e- Subgroup sample sizes reflect the overall sample prior to disease-specific exclusions for prevalent conditions (e.g., prior to removal of prevalent atrial fibrillation for the incident atrial fibrillation analysis).

**eTable 8.** Associations between physical activity pattern and incident cardiovascular disease with 2-year blanking period after accelerometer

| Activity Pattern                                                                                                                                                                                                                                                                                                                                                                                                                                                                                                                                                                                                                                                                                                                                                                                                                                                                                                                                                                                                                   | Atrial fibrillation <sup>a</sup><br>(n=85,902) |                                 |                                | Myocardial infarction <sup>a</sup><br>(n=86,705) |                                 |                                | Heart failure <sup>a</sup><br>(n=88,146) |                                 |                                | Stroke <sup>a</sup><br>(n=87,624)     |                                 |                                |
|------------------------------------------------------------------------------------------------------------------------------------------------------------------------------------------------------------------------------------------------------------------------------------------------------------------------------------------------------------------------------------------------------------------------------------------------------------------------------------------------------------------------------------------------------------------------------------------------------------------------------------------------------------------------------------------------------------------------------------------------------------------------------------------------------------------------------------------------------------------------------------------------------------------------------------------------------------------------------------------------------------------------------------|------------------------------------------------|---------------------------------|--------------------------------|--------------------------------------------------|---------------------------------|--------------------------------|------------------------------------------|---------------------------------|--------------------------------|---------------------------------------|---------------------------------|--------------------------------|
|                                                                                                                                                                                                                                                                                                                                                                                                                                                                                                                                                                                                                                                                                                                                                                                                                                                                                                                                                                                                                                    | Hazard ratio<br>(95% CI) <sup>b</sup>          | E <sub>point</sub> <sup>c</sup> | E <sub>null</sub> <sup>c</sup> | Hazard ratio<br>(95% CI) <sup>b</sup>            | E <sub>point</sub> <sup>c</sup> | E <sub>null</sub> <sup>c</sup> | Hazard ratio<br>(95% CI) <sup>b</sup>    | E <sub>point</sub> <sup>c</sup> | E <sub>null</sub> <sup>c</sup> | Hazard ratio<br>(95% CI) <sup>b</sup> | E <sub>point</sub> <sup>c</sup> | E <sub>null</sub> <sup>c</sup> |
| <b>Activity threshold: Guideline-based (≥150 minutes MVPA/week)<sup>d</sup></b>                                                                                                                                                                                                                                                                                                                                                                                                                                                                                                                                                                                                                                                                                                                                                                                                                                                                                                                                                    |                                                |                                 |                                |                                                  |                                 |                                |                                          |                                 |                                |                                       |                                 |                                |
| Inactive (n=30,228) <sup>e</sup>                                                                                                                                                                                                                                                                                                                                                                                                                                                                                                                                                                                                                                                                                                                                                                                                                                                                                                                                                                                                   | 1.00 (0.93-1.08)                               | 1.00                            | 1.00                           | 1.00 (0.90-1.11)                                 | 1.00                            | 1.00                           | 1.00 (0.91-1.10)                         | 1.00                            | 1.00                           | 1.00 (0.88-1.14)                      | 1.00                            | 1.00                           |
| Weekend warrior (n=37,872) <sup>e</sup>                                                                                                                                                                                                                                                                                                                                                                                                                                                                                                                                                                                                                                                                                                                                                                                                                                                                                                                                                                                            | 0.77 (0.72-0.83)                               | 1.92                            | 1.70                           | 0.69 (0.63-0.77)                                 | 2.26                            | 1.92                           | 0.63 (0.57-0.71)                         | 2.55                            | 2.17                           | 0.85 (0.75-0.96)                      | 1.63                            | 1.25                           |
| Regular activity (n=21,473) <sup>e</sup>                                                                                                                                                                                                                                                                                                                                                                                                                                                                                                                                                                                                                                                                                                                                                                                                                                                                                                                                                                                           | 0.81 (0.73-0.89)                               | 1.77                            | 1.50                           | 0.61 (0.52-0.71)                                 | 2.66                            | 2.17                           | 0.60 (0.51-0.70)                         | 2.72                            | 2.21                           | 0.90 (0.76-1.07)                      | 1.46                            | 1.00                           |
| <b>Activity threshold: 50<sup>th</sup> percentile (≥230.4 minutes MVPA/week)<sup>d</sup></b>                                                                                                                                                                                                                                                                                                                                                                                                                                                                                                                                                                                                                                                                                                                                                                                                                                                                                                                                       |                                                |                                 |                                |                                                  |                                 |                                |                                          |                                 |                                |                                       |                                 |                                |
| Inactive (n=44,156) <sup>e</sup>                                                                                                                                                                                                                                                                                                                                                                                                                                                                                                                                                                                                                                                                                                                                                                                                                                                                                                                                                                                                   | 1.00 (0.94-1.07)                               | 1.00                            | 1.00                           | 1.00 (0.91-1.10)                                 | 1.00                            | 1.00                           | 1.00 (0.92-1.09)                         | 1.00                            | 1.00                           | 1.00 (0.89-1.12)                      | 1.00                            | 1.00                           |
| Weekend warrior (n=26,473) <sup>e</sup>                                                                                                                                                                                                                                                                                                                                                                                                                                                                                                                                                                                                                                                                                                                                                                                                                                                                                                                                                                                            | 0.82 (0.75-0.89)                               | 1.74                            | 1.50                           | 0.70 (0.61-0.80)                                 | 2.21                            | 1.81                           | 0.72 (0.63-0.82)                         | 2.12                            | 1.74                           | 0.97 (0.83-1.12)                      | 1.21                            | 1.00                           |
| Regular activity (n=18,944) <sup>e</sup>                                                                                                                                                                                                                                                                                                                                                                                                                                                                                                                                                                                                                                                                                                                                                                                                                                                                                                                                                                                           | 0.84 (0.75-0.93)                               | 1.67                            | 1.36                           | 0.66 (0.56-0.78)                                 | 2.40                            | 1.88                           | 0.64 (0.54-0.76)                         | 2.50                            | 1.96                           | 0.92 (0.76-1.11)                      | 1.39                            | 1.00                           |
| <p>a- Number of events as follows: atrial fibrillation n=1,943, myocardial infarction n=807, heart failure n=777, stroke n=548</p> <p>b- Hazard ratios obtained using the floating absolute risks method</p> <p>c- E-values estimate the strength of association with exposure and estimate the potential unmeasured confounders required to nullify the observed effect. E<sub>point</sub> denotes E-value for the point estimate and E<sub>null</sub> denotes the E-value for the confidence interval bound closest to the null.</p> <p>d- Inactive defined as weekly MVPA below the specified threshold. All models adjusted for age, sex, race, tobacco use, Townsend Deprivation Index, alcohol use, diet quality, educational attainment, employment status, and self-reported health.</p> <p>e- Subgroup sample sizes reflect the overall sample prior to disease-specific exclusions for prevalent conditions (e.g., prior to removal of prevalent atrial fibrillation for the incident atrial fibrillation analysis).</p> |                                                |                                 |                                |                                                  |                                 |                                |                                          |                                 |                                |                                       |                                 |                                |

**eTable 9.** Associations between physical activity pattern and incident cardiovascular disease in models additionally adjusted for body mass index, blood pressure, anti-hypertensive use, and diabetes

| Activity Pattern                                                                                                                                                                                                                                                                                                                                                                                                                                                                                                                                                                                                                                                                                                                                                                                                                                                                                                                                                                                                                                                                                                                                      | Atrial fibrillation <sup>a</sup><br>(n=86,814) |                                 |                                | Myocardial infarction <sup>a</sup><br>(n=87,262) |                                 |                                | Heart failure <sup>a</sup><br>(n=88,646) |                                 |                                | Stroke <sup>a</sup><br>(n=88,089)     |                                 |                                |
|-------------------------------------------------------------------------------------------------------------------------------------------------------------------------------------------------------------------------------------------------------------------------------------------------------------------------------------------------------------------------------------------------------------------------------------------------------------------------------------------------------------------------------------------------------------------------------------------------------------------------------------------------------------------------------------------------------------------------------------------------------------------------------------------------------------------------------------------------------------------------------------------------------------------------------------------------------------------------------------------------------------------------------------------------------------------------------------------------------------------------------------------------------|------------------------------------------------|---------------------------------|--------------------------------|--------------------------------------------------|---------------------------------|--------------------------------|------------------------------------------|---------------------------------|--------------------------------|---------------------------------------|---------------------------------|--------------------------------|
|                                                                                                                                                                                                                                                                                                                                                                                                                                                                                                                                                                                                                                                                                                                                                                                                                                                                                                                                                                                                                                                                                                                                                       | Hazard ratio<br>(95% CI) <sup>b</sup>          | E <sub>point</sub> <sup>c</sup> | E <sub>null</sub> <sup>c</sup> | Hazard ratio<br>(95% CI) <sup>b</sup>            | E <sub>point</sub> <sup>c</sup> | E <sub>null</sub> <sup>c</sup> | Hazard ratio<br>(95% CI) <sup>b</sup>    | E <sub>point</sub> <sup>c</sup> | E <sub>null</sub> <sup>c</sup> | Hazard ratio<br>(95% CI) <sup>b</sup> | E <sub>point</sub> <sup>c</sup> | E <sub>null</sub> <sup>c</sup> |
| <b>Activity threshold: Guideline-based (≥150 minutes MVPA/week)<sup>d</sup></b>                                                                                                                                                                                                                                                                                                                                                                                                                                                                                                                                                                                                                                                                                                                                                                                                                                                                                                                                                                                                                                                                       |                                                |                                 |                                |                                                  |                                 |                                |                                          |                                 |                                |                                       |                                 |                                |
| Inactive (n=30,102) <sup>e</sup>                                                                                                                                                                                                                                                                                                                                                                                                                                                                                                                                                                                                                                                                                                                                                                                                                                                                                                                                                                                                                                                                                                                      | 1.00 (0.93-1.07)                               | 1.00                            | 1.00                           | 1.00 (0.91-1.10)                                 | 1.00                            | 1.00                           | 1.00 (0.91-1.10)                         | 1.00                            | 1.00                           | 1.00 (0.89-1.12)                      | 1.00                            | 1.00                           |
| Weekend warrior (n=37,804) <sup>e</sup>                                                                                                                                                                                                                                                                                                                                                                                                                                                                                                                                                                                                                                                                                                                                                                                                                                                                                                                                                                                                                                                                                                               | 0.86 (0.81-0.92)                               | 1.60                            | 1.39                           | 0.79 (0.72-0.86)                                 | 1.85                            | 1.60                           | 0.70 (0.64-0.78)                         | 2.21                            | 1.88                           | 0.81 (0.73-0.91)                      | 1.77                            | 1.43                           |
| Regular activity (n=21,438) <sup>e</sup>                                                                                                                                                                                                                                                                                                                                                                                                                                                                                                                                                                                                                                                                                                                                                                                                                                                                                                                                                                                                                                                                                                              | 0.91 (0.83-0.99)                               | 1.43                            | 1.11                           | 0.71 (0.62-0.81)                                 | 2.17                            | 1.77                           | 0.75 (0.66-0.85)                         | 2.00                            | 1.63                           | 0.87 (0.75-1.01)                      | 1.56                            | 1.00                           |
| <b>Activity threshold: 50<sup>th</sup> percentile (≥230.4 minutes MVPA/week)<sup>d</sup></b>                                                                                                                                                                                                                                                                                                                                                                                                                                                                                                                                                                                                                                                                                                                                                                                                                                                                                                                                                                                                                                                          |                                                |                                 |                                |                                                  |                                 |                                |                                          |                                 |                                |                                       |                                 |                                |
| Inactive (n=44,005) <sup>e</sup>                                                                                                                                                                                                                                                                                                                                                                                                                                                                                                                                                                                                                                                                                                                                                                                                                                                                                                                                                                                                                                                                                                                      | 1.00 (0.94-1.06)                               | 1.00                            | 1.00                           | 1.00 (0.91-1.10)                                 | 1.00                            | 1.00                           | 1.00 (0.92-1.09)                         | 1.00                            | 1.00                           | 1.00 (0.90-1.11)                      | 1.00                            | 1.00                           |
| Weekend warrior (n=26,428) <sup>e</sup>                                                                                                                                                                                                                                                                                                                                                                                                                                                                                                                                                                                                                                                                                                                                                                                                                                                                                                                                                                                                                                                                                                               | 0.90 (0.83-0.96)                               | 1.46                            | 1.25                           | 0.82 (0.74-0.92)                                 | 1.74                            | 1.39                           | 0.78 (0.69-0.87)                         | 1.88                            | 1.56                           | 0.92 (0.81-1.05)                      | 1.39                            | 1.00                           |
| Regular activity (n=18,911) <sup>e</sup>                                                                                                                                                                                                                                                                                                                                                                                                                                                                                                                                                                                                                                                                                                                                                                                                                                                                                                                                                                                                                                                                                                              | 0.93 (0.85-1.01)                               | 1.36                            | 1.00                           | 0.77 (0.67-0.89)                                 | 1.92                            | 1.50                           | 0.80 (0.69-0.92)                         | 1.81                            | 1.39                           | 0.90 (0.77-1.06)                      | 1.46                            | 1.00                           |
| <p>a- Number of events as follows: atrial fibrillation n=2,628, myocardial infarction n=1,224, heart failure n=1,261, stroke n=835</p> <p>b- Hazard ratios obtained using the floating absolute risks method</p> <p>c- E-values estimate the strength of association with exposure and estimate the outcome of potential unmeasured confounders required to nullify the observed effect. E<sub>point</sub> denotes E-value for the point estimate and E<sub>null</sub> denotes the E-value for the confidence interval bound closest to the null.</p> <p>d- Inactive defined as weekly MVPA below the specified threshold. All models adjusted for age, sex, race, tobacco use, Townsend Deprivation Index, alcohol use, diet quality, educational attainment, employment status, self-reported health, body mass index, systolic blood pressure, diastolic blood pressure, anti-hypertensive use, and diabetes</p> <p>e- Subgroup sample sizes reflect the overall sample prior to disease-specific exclusions for prevalent conditions (e.g., prior to removal of prevalent atrial fibrillation for the incident atrial fibrillation analysis).</p> |                                                |                                 |                                |                                                  |                                 |                                |                                          |                                 |                                |                                       |                                 |                                |

**eTable 10.** Associations between physical activity pattern and incident cardiovascular disease with individuals with incomplete accelerometer data assumed to be inactive

| Activity Pattern                                                                                                                                                                                                                                                                                                                                                                                                                                                                                                                                                                                                                                                                                                                                                                                                                                                                                                                                                                                                                                                                            | Atrial fibrillation <sup>a</sup><br>(n=90,853) |                                 |                                | Myocardial infarction <sup>a</sup><br>(n=91,305) |                                 |                                | Heart failure <sup>a</sup><br>(n=92,762) |                                 |                                | Stroke <sup>a</sup><br>(n=92,196)     |                                 |                                |
|---------------------------------------------------------------------------------------------------------------------------------------------------------------------------------------------------------------------------------------------------------------------------------------------------------------------------------------------------------------------------------------------------------------------------------------------------------------------------------------------------------------------------------------------------------------------------------------------------------------------------------------------------------------------------------------------------------------------------------------------------------------------------------------------------------------------------------------------------------------------------------------------------------------------------------------------------------------------------------------------------------------------------------------------------------------------------------------------|------------------------------------------------|---------------------------------|--------------------------------|--------------------------------------------------|---------------------------------|--------------------------------|------------------------------------------|---------------------------------|--------------------------------|---------------------------------------|---------------------------------|--------------------------------|
|                                                                                                                                                                                                                                                                                                                                                                                                                                                                                                                                                                                                                                                                                                                                                                                                                                                                                                                                                                                                                                                                                             | Hazard ratio<br>(95% CI) <sup>b</sup>          | E <sub>point</sub> <sup>c</sup> | E <sub>null</sub> <sup>c</sup> | Hazard ratio<br>(95% CI) <sup>b</sup>            | E <sub>point</sub> <sup>c</sup> | E <sub>null</sub> <sup>c</sup> | Hazard ratio<br>(95% CI) <sup>b</sup>    | E <sub>point</sub> <sup>c</sup> | E <sub>null</sub> <sup>c</sup> | Hazard ratio<br>(95% CI) <sup>b</sup> | E <sub>point</sub> <sup>c</sup> | E <sub>null</sub> <sup>c</sup> |
| <b>Activity threshold: Guideline-based (≥150 minutes MVPA/week)<sup>d</sup></b>                                                                                                                                                                                                                                                                                                                                                                                                                                                                                                                                                                                                                                                                                                                                                                                                                                                                                                                                                                                                             |                                                |                                 |                                |                                                  |                                 |                                |                                          |                                 |                                |                                       |                                 |                                |
| Inactive (n=34,153) <sup>e</sup>                                                                                                                                                                                                                                                                                                                                                                                                                                                                                                                                                                                                                                                                                                                                                                                                                                                                                                                                                                                                                                                            | 1.00 (0.94-1.06)                               | 1.00                            | 1.00                           | 1.00 (0.92-1.09)                                 | 1.00                            | 1.00                           | 1.00 (0.92-1.09)                         | 1.00                            | 1.00                           | 1.00 (0.90-1.11)                      | 1.00                            | 1.00                           |
| Weekend warrior (n=37,872) <sup>e</sup>                                                                                                                                                                                                                                                                                                                                                                                                                                                                                                                                                                                                                                                                                                                                                                                                                                                                                                                                                                                                                                                     | 0.78 (0.73-0.83)                               | 1.88                            | 1.70                           | 0.75 (0.69-0.82)                                 | 2.00                            | 1.74                           | 0.64 (0.58-0.70)                         | 2.50                            | 2.21                           | 0.79 (0.71-0.88)                      | 1.85                            | 1.53                           |
| Regular activity (n=21,473) <sup>e</sup>                                                                                                                                                                                                                                                                                                                                                                                                                                                                                                                                                                                                                                                                                                                                                                                                                                                                                                                                                                                                                                                    | 0.81 (0.74-0.88)                               | 1.77                            | 1.60                           | 0.67 (0.59-0.76)                                 | 2.35                            | 1.96                           | 0.66 (0.58-0.75)                         | 2.40                            | 2.00                           | 0.88 (0.72-0.97)                      | 1.53                            | 1.21                           |
| <b>Activity threshold: 50<sup>th</sup> percentile (≥230.4 minutes MVPA/week)<sup>d</sup></b>                                                                                                                                                                                                                                                                                                                                                                                                                                                                                                                                                                                                                                                                                                                                                                                                                                                                                                                                                                                                |                                                |                                 |                                |                                                  |                                 |                                |                                          |                                 |                                |                                       |                                 |                                |
| Inactive (n=48,081) <sup>e</sup>                                                                                                                                                                                                                                                                                                                                                                                                                                                                                                                                                                                                                                                                                                                                                                                                                                                                                                                                                                                                                                                            | 1.00 (0.95-1.06)                               | 1.00                            | 1.00                           | 1.00 (0.93-1.08)                                 | 1.00                            | 1.00                           | 1.00 (0.93-1.08)                         | 1.00                            | 1.00                           | 1.00 (0.91-1.10)                      | 1.00                            | 1.00                           |
| Weekend warrior (n=26,473) <sup>e</sup>                                                                                                                                                                                                                                                                                                                                                                                                                                                                                                                                                                                                                                                                                                                                                                                                                                                                                                                                                                                                                                                     | 0.81 (0.75-0.87)                               | 1.77                            | 1.56                           | 0.78 (0.70-0.87)                                 | 1.88                            | 1.56                           | 0.69 (0.62-0.78)                         | 2.26                            | 1.88                           | 0.89 (0.78-1.01)                      | 1.50                            | 1.00                           |
| Regular activity (n=18,944) <sup>e</sup>                                                                                                                                                                                                                                                                                                                                                                                                                                                                                                                                                                                                                                                                                                                                                                                                                                                                                                                                                                                                                                                    | 0.83 (0.76-0.91)                               | 1.70                            | 1.43                           | 0.73 (0.63-0.83)                                 | 2.08                            | 1.70                           | 0.70 (0.60-0.80)                         | 2.21                            | 1.81                           | 0.86 (0.73-1.02)                      | 1.60                            | 1.00                           |
| <p>a- Number of events as follows: atrial fibrillation n=2,780, myocardial infarction n=1,284, heart failure n=1,331, stroke n=882</p> <p>b- Hazard ratios obtained using the floating absolute risks method</p> <p>c- E-values estimate the strength of association with exposure and estimate the strength of association with exposure and outcome of potential unmeasured confounders required to nullify the observed effect. E<sub>point</sub> denotes E-value for the point estimate and E<sub>null</sub> denotes the E-value for the confidence interval bound closest to the null.</p> <p>d- Inactive defined as weekly MVPA below the specified threshold. All models adjusted for age, sex, race, tobacco use, Townsend Deprivation Index, alcohol use, diet quality, educational attainment, employment status, and self-reported health.</p> <p>e- Subgroup sample sizes reflect the overall sample prior to disease-specific exclusions for prevalent conditions (e.g., prior to removal of prevalent atrial fibrillation for the incident atrial fibrillation analysis).</p> |                                                |                                 |                                |                                                  |                                 |                                |                                          |                                 |                                |                                       |                                 |                                |

**eTable 11.** Associations between physical activity pattern and incident cardiovascular disease among individuals with complete wear time (no imputed values)

| Activity Pattern <sup>a</sup>                                                                                                                                                                                                                                                                                                                                                                                                                                                                                                                                                                                                                                                                                                                                                                                                                                                                                                                                                                                                                                                                                                                                                  | Atrial fibrillation <sup>b</sup><br>(n=65,076) |                                 |                                | Myocardial infarction <sup>b</sup><br>(n=65,428) |                                 |                                | Heart failure <sup>b</sup><br>(n=66,509) |                                 |                                | Stroke <sup>b</sup><br>(n=66,087)     |                                 |                                |
|--------------------------------------------------------------------------------------------------------------------------------------------------------------------------------------------------------------------------------------------------------------------------------------------------------------------------------------------------------------------------------------------------------------------------------------------------------------------------------------------------------------------------------------------------------------------------------------------------------------------------------------------------------------------------------------------------------------------------------------------------------------------------------------------------------------------------------------------------------------------------------------------------------------------------------------------------------------------------------------------------------------------------------------------------------------------------------------------------------------------------------------------------------------------------------|------------------------------------------------|---------------------------------|--------------------------------|--------------------------------------------------|---------------------------------|--------------------------------|------------------------------------------|---------------------------------|--------------------------------|---------------------------------------|---------------------------------|--------------------------------|
|                                                                                                                                                                                                                                                                                                                                                                                                                                                                                                                                                                                                                                                                                                                                                                                                                                                                                                                                                                                                                                                                                                                                                                                | Hazard ratio<br>(95% CI) <sup>c</sup>          | E <sub>point</sub> <sup>d</sup> | E <sub>null</sub> <sup>d</sup> | Hazard ratio<br>(95% CI) <sup>c</sup>            | E <sub>point</sub> <sup>d</sup> | E <sub>null</sub> <sup>d</sup> | Hazard ratio<br>(95% CI) <sup>c</sup>    | E <sub>point</sub> <sup>d</sup> | E <sub>null</sub> <sup>d</sup> | Hazard ratio<br>(95% CI) <sup>c</sup> | E <sub>point</sub> <sup>d</sup> | E <sub>null</sub> <sup>d</sup> |
| <b>Activity threshold: Guideline-based (≥150 minutes MVPA/week)<sup>e</sup></b>                                                                                                                                                                                                                                                                                                                                                                                                                                                                                                                                                                                                                                                                                                                                                                                                                                                                                                                                                                                                                                                                                                |                                                |                                 |                                |                                                  |                                 |                                |                                          |                                 |                                |                                       |                                 |                                |
| Inactive (n=22,222) <sup>f</sup>                                                                                                                                                                                                                                                                                                                                                                                                                                                                                                                                                                                                                                                                                                                                                                                                                                                                                                                                                                                                                                                                                                                                               | 1.00 (0.93-1.08)                               | 1.00                            | 1.00                           | 1.00 (0.90-1.12)                                 | 1.00                            | 1.00                           | 1.00 (0.91-1.10)                         | 1.00                            | 1.00                           | 1.00 (0.88-1.14)                      | 1.00                            | 1.00                           |
| Weekend warrior (n=29,381) <sup>f</sup>                                                                                                                                                                                                                                                                                                                                                                                                                                                                                                                                                                                                                                                                                                                                                                                                                                                                                                                                                                                                                                                                                                                                        | 0.78 (0.73-0.87)                               | 1.88                            | 1.56                           | 0.76 (0.68-0.84)                                 | 1.96                            | 1.67                           | 0.62 (0.55-0.69)                         | 2.61                            | 2.26                           | 0.86 (0.75-0.97)                      | 1.60                            | 1.21                           |
| Regular activity (n=15,445) <sup>f</sup>                                                                                                                                                                                                                                                                                                                                                                                                                                                                                                                                                                                                                                                                                                                                                                                                                                                                                                                                                                                                                                                                                                                                       | 0.79 (0.72-0.87)                               | 1.85                            | 1.56                           | 0.67 (0.58-0.78)                                 | 2.35                            | 1.96                           | 0.61 (0.52-0.72)                         | 2.66                            | 2.12                           | 0.88 (0.74-1.04)                      | 1.53                            | 1.00                           |
| <b>Activity threshold: 50<sup>th</sup> percentile (≥230.4 minutes MVPA/week)<sup>e</sup></b>                                                                                                                                                                                                                                                                                                                                                                                                                                                                                                                                                                                                                                                                                                                                                                                                                                                                                                                                                                                                                                                                                   |                                                |                                 |                                |                                                  |                                 |                                |                                          |                                 |                                |                                       |                                 |                                |
| Inactive (n=32,704) <sup>f</sup>                                                                                                                                                                                                                                                                                                                                                                                                                                                                                                                                                                                                                                                                                                                                                                                                                                                                                                                                                                                                                                                                                                                                               | 1.00 (0.94-1.07)                               | 1.00                            | 1.00                           | 1.00 (0.92-1.10)                                 | 1.00                            | 1.00                           | 1.00 (0.92-1.09)                         | 1.00                            | 1.00                           | 1.00 (0.89-1.12)                      | 1.00                            | 1.00                           |
| Weekend warrior (n=20,596) <sup>f</sup>                                                                                                                                                                                                                                                                                                                                                                                                                                                                                                                                                                                                                                                                                                                                                                                                                                                                                                                                                                                                                                                                                                                                        | 0.83 (0.76-0.90)                               | 1.70                            | 1.46                           | 0.81 (0.72-0.92)                                 | 1.77                            | 1.39                           | 0.68 (0.60-0.78)                         | 2.30                            | 1.88                           | 0.96 (0.83-1.11)                      | 1.25                            | 1.00                           |
| Regular activity (n=13,748) <sup>f</sup>                                                                                                                                                                                                                                                                                                                                                                                                                                                                                                                                                                                                                                                                                                                                                                                                                                                                                                                                                                                                                                                                                                                                       | 0.84 (0.75-0.93)                               | 1.67                            | 1.36                           | 0.74 (0.64-0.88)                                 | 2.04                            | 1.53                           | 0.66 (0.56-0.79)                         | 2.40                            | 1.85                           | 0.91 (0.76-1.10)                      | 1.43                            | 1.00                           |
| <p>a- Complete wear time defined as ≥20 hours of true (i.e., non-imputed) wear time on each of the seven days of accelerometer monitoring</p> <p>b- Number of events as follows: atrial fibrillation n=2,041, myocardial infarction n=912, heart failure n=968, stroke n=649</p> <p>c- Hazard ratios obtained using the floating absolute risks method</p> <p>d- E-values estimate the strength of association with exposure and outcome of potential unmeasured confounders required to nullify the observed effect. E<sub>point</sub> denotes E-value for the point estimate and E<sub>null</sub> denotes the E-value for the confidence interval bound closest to the null.</p> <p>e- Inactive defined as weekly MVPA below the specified threshold. All models adjusted for age, sex, race, tobacco use, Townsend Deprivation Index, alcohol use, diet quality, educational attainment, employment status, and self-reported health.</p> <p>f- Subgroup sample sizes reflect the overall sample prior to disease-specific exclusions for prevalent conditions (e.g., prior to removal of prevalent atrial fibrillation for the incident atrial fibrillation analysis).</p> |                                                |                                 |                                |                                                  |                                 |                                |                                          |                                 |                                |                                       |                                 |                                |

**eTable 12.** Associations between physical activity pattern and incident musculoskeletal disease

| Activity Pattern                                                                                                                                                                                                                                                                                                                                                                                                                                                                                                                                                                                                                                                                                                                                                                                                                                                           | Hazard ratio (95% CI) <sup>a</sup> | E <sub>point</sub> <sup>c</sup> | E <sub>null</sub> <sup>c</sup> |
|----------------------------------------------------------------------------------------------------------------------------------------------------------------------------------------------------------------------------------------------------------------------------------------------------------------------------------------------------------------------------------------------------------------------------------------------------------------------------------------------------------------------------------------------------------------------------------------------------------------------------------------------------------------------------------------------------------------------------------------------------------------------------------------------------------------------------------------------------------------------------|------------------------------------|---------------------------------|--------------------------------|
| <b>Activity threshold: Guideline-based (≥150 minutes MVPA/week)</b>                                                                                                                                                                                                                                                                                                                                                                                                                                                                                                                                                                                                                                                                                                                                                                                                        |                                    |                                 |                                |
| Inactive (n=21,737) <sup>e</sup>                                                                                                                                                                                                                                                                                                                                                                                                                                                                                                                                                                                                                                                                                                                                                                                                                                           | 1.00 (0.96-1.04)                   | 1.00                            | 1.00                           |
| Weekend warrior (n=28,846) <sup>e</sup>                                                                                                                                                                                                                                                                                                                                                                                                                                                                                                                                                                                                                                                                                                                                                                                                                                    | 0.87 (0.84-0.91)                   | 1.56                            | 1.43                           |
| Regular activity (n=16,638) <sup>e</sup>                                                                                                                                                                                                                                                                                                                                                                                                                                                                                                                                                                                                                                                                                                                                                                                                                                   | 0.89 (0.85-0.94)                   | 1.50                            | 1.32                           |
| <b>Activity threshold: 50<sup>th</sup> percentile (≥230.4 minutes MVPA/week)</b>                                                                                                                                                                                                                                                                                                                                                                                                                                                                                                                                                                                                                                                                                                                                                                                           |                                    |                                 |                                |
| Inactive (n=32,327) <sup>e</sup>                                                                                                                                                                                                                                                                                                                                                                                                                                                                                                                                                                                                                                                                                                                                                                                                                                           | 1.00 (0.96-1.04)                   | 1.00                            | 1.00                           |
| Weekend warrior (n=20,214) <sup>e</sup>                                                                                                                                                                                                                                                                                                                                                                                                                                                                                                                                                                                                                                                                                                                                                                                                                                    | 0.91 (0.87-0.96)                   | 1.43                            | 1.25                           |
| Regular activity (n=14,680) <sup>e</sup>                                                                                                                                                                                                                                                                                                                                                                                                                                                                                                                                                                                                                                                                                                                                                                                                                                   | 0.93 (0.88-0.98)                   | 1.36                            | 1.16                           |
| <p>a- Hazard ratios obtained using the floating absolute risks method<br/> b- Number of incident musculoskeletal events: 6,736<br/> c- E-values estimate the strength of association with exposure and outcome of potential unmeasured confounders required to nullify the observed effect. E<sub>point</sub> denotes E-value for the point estimate and E<sub>null</sub> denotes the E-value for the confidence interval bound closest to the null.<br/> d- Inactive defined as weekly MVPA below the specified threshold. All models adjusted for age, sex, race, tobacco use, Townsend Deprivation Index, alcohol use, diet quality, educational attainment, employment status, and self-reported health.<br/> e- Subgroup sample sizes reflect the analysis sample (i.e., individuals without prevalent musculoskeletal disease at the time of accelerometer wear)</p> |                                    |                                 |                                |

**eFigure 1. Study flow**

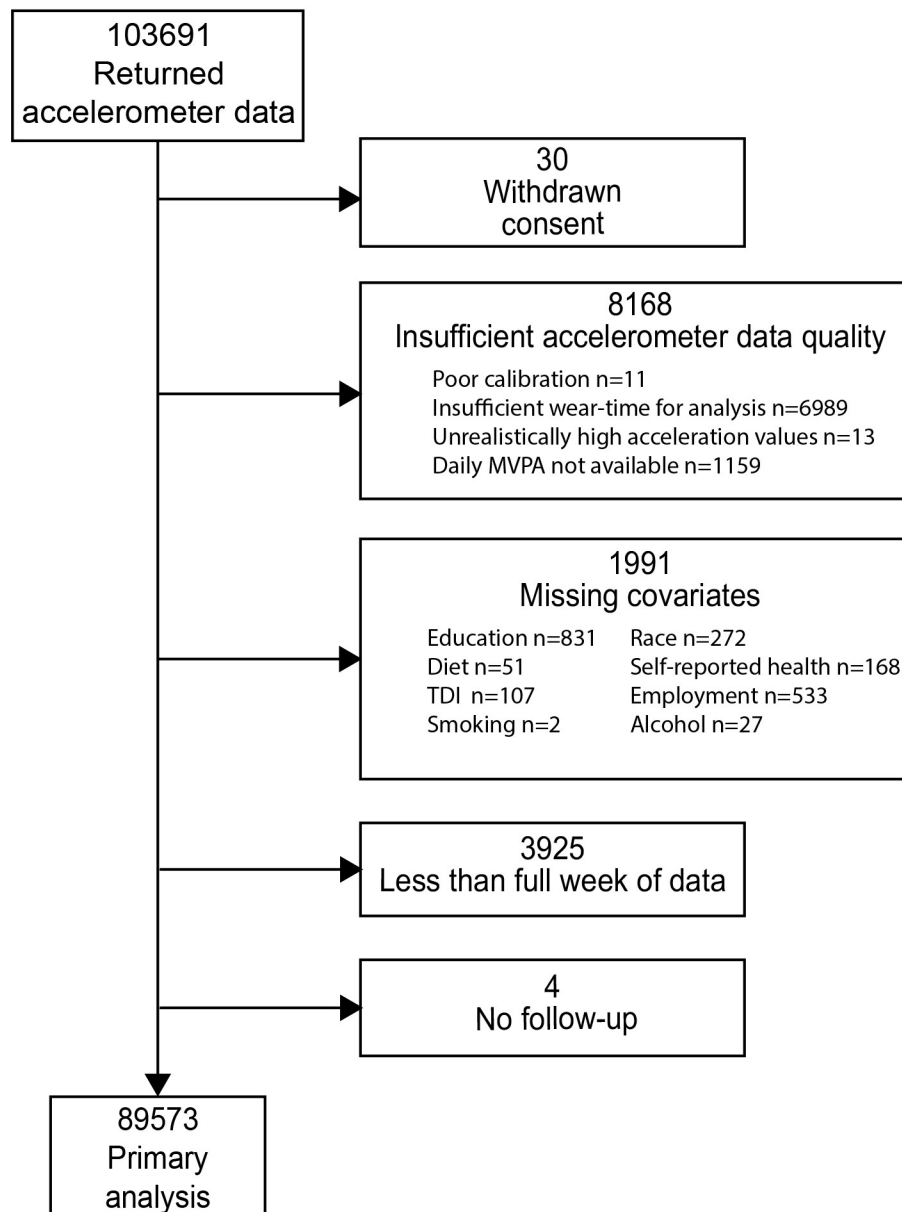

Depicted is an overview of the composition of the primary analysis sample. Of 103,691 individuals submitting accelerometer data, individuals were sequentially excluded for withdrawn consent, insufficient accelerometer data quality, missing covariates, less than a full week of data, and absence of clinical follow-up data (see **eMethods**), resulting in 89,573 individuals in the primary analysis.



**eFigure 2.** Distribution of moderate-to-vigorous physical activity on top two days versus remaining five days among active individuals based on guideline-based threshold of  $\geq 230.4$  minutes of MVPA per week (sample median)

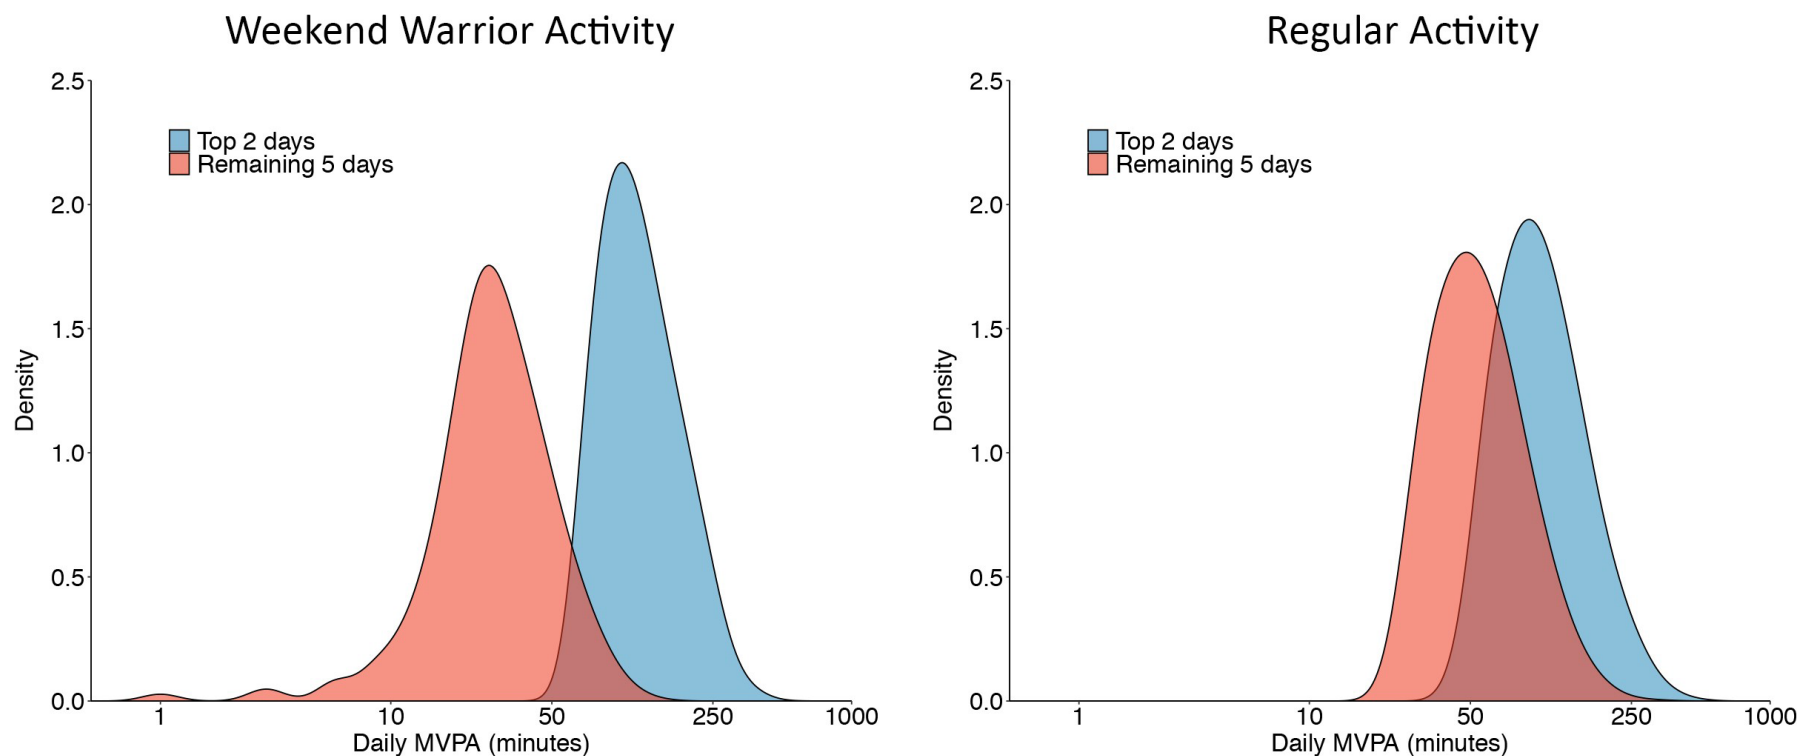

Depicted is the distribution of daily moderate-to-vigorous physical activity (MVPA) on the two most active days of the week (blue), versus the remaining five days (red), among individuals above the sample median (i.e.,  $\geq 230.4$  minutes MVPA over the week,  $n=45,417$ ). Individuals meeting criteria for weekend warrior activity (i.e.,  $\geq 50\%$  of total MVPA achieved in 1-2 days) are shown in panel A. Active individuals not meeting criteria for weekend warrior activity (“Regular”) are shown in panel B. A total of 144 individuals in the weekend warrior group (0.5%) with a value of zero for the remaining five days were attributed one minute of MVPA to accommodate logarithmic x-axis scale.

**eFigure 3.** Cumulative risk of incident cardiovascular events stratified by activity pattern using an activity threshold of  $\geq 150$  minutes of MVPA per week (guideline-based)

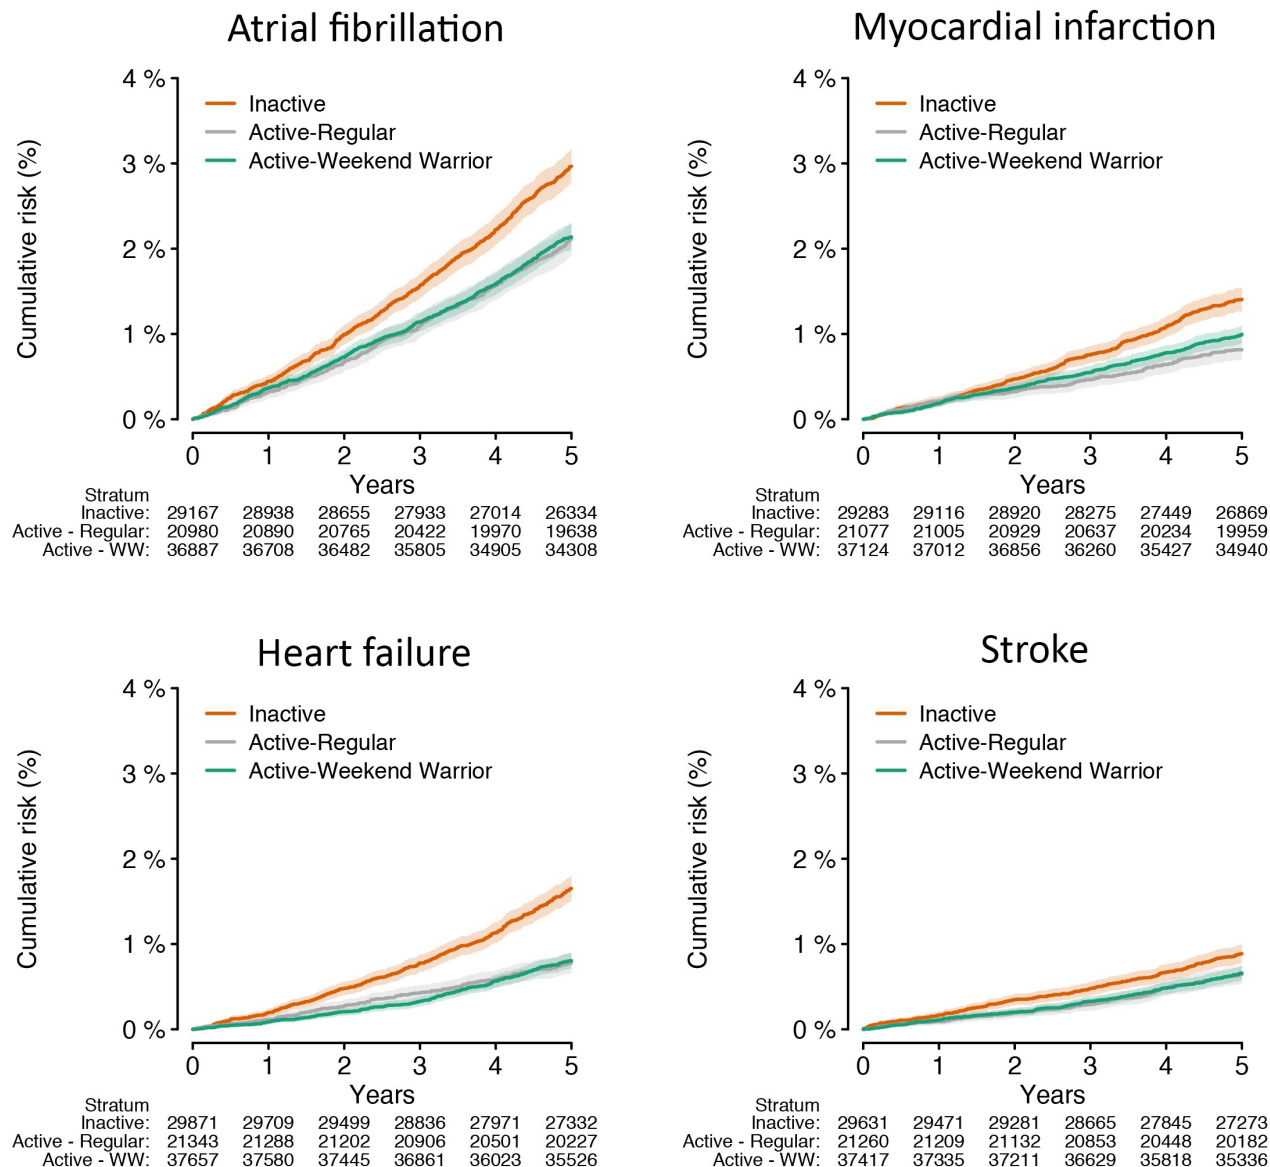

Plots depicting the crude cumulative risk of incident cardiovascular events, stratified by accelerometer-derived activity pattern (Inactive = orange, Active-Weekend Warrior [Active-WW] = green, Active-Regular = gray). Each plot utilizes the guideline-based threshold for activity ( $\geq 150$  minutes MVPA/week). Person-time in each stratum is summarized as follows: Atrial fibrillation Inactive: 6.2 (5.7, 6.8), Active-Weekend Warrior: 6.3 (5.7, 6.8), Active-Regular: 6.3 (5.8, 6.9); Myocardial infarction Inactive: 6.3 (5.7, 6.8), Active-Weekend Warrior: 6.3 (5.8, 6.8), Active-Regular: 6.4 (5.8, 6.9); Heart failure Inactive: 6.3 (5.7, 6.8), Active-Weekend Warrior: 6.2 (5.8, 6.8), Active-Regular: 6.4 (5.8, 6.9); Stroke Inactive: 6.3 (5.7, 6.8), Active-Weekend Warrior: 6.3 (5.8, 6.8), Active-Regular: 6.4 (5.8, 6.9). The number at-risk over time is depicted below each plot. MVPA = moderate-to-vigorous physical activity. Shaded regions depict 95% confidence intervals.

**eFigure 4.** Cumulative risk of incident cardiovascular events stratified by activity pattern using an activity threshold of  $\geq 230.4$  minutes of MVPA per week (sample median)

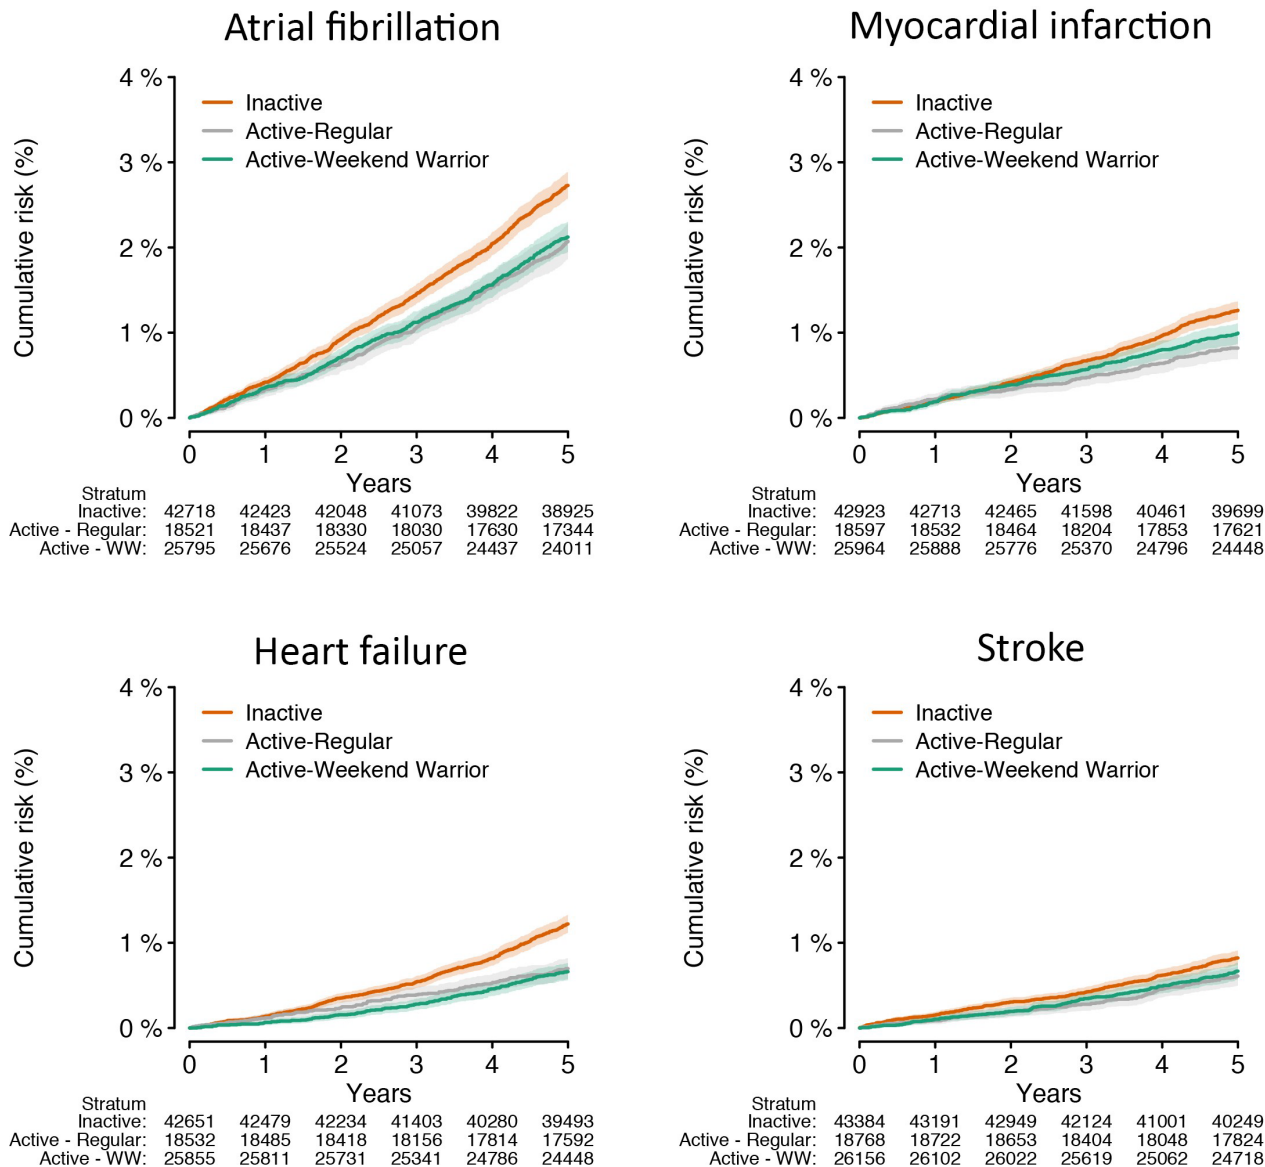

Plots depicting the crude cumulative risk of incident cardiovascular events, stratified by accelerometer-derived activity pattern (Inactive = orange, Active-Weekend Warrior [Active-WW] = green, Active-Regular = gray). Each plot utilizes the median threshold for activity ( $\geq 230.4$  minutes MVPA/week). Person-time in each stratum is summarized as follows: Atrial fibrillation Inactive: 6.3 (5.7, 6.8), Active-Weekend Warrior: 6.3 (5.7, 6.8), Active-Regular: 6.3 (5.8, 6.9); Myocardial infarction Inactive: 6.3 (5.7, 6.8), Active-Weekend Warrior: 6.3 (5.8, 6.8), Active-Regular: 6.4 (5.8, 6.9); Heart failure Inactive: 6.3 (5.7, 6.8), Active-Weekend Warrior: 6.3 (5.8, 6.8), Active-Regular: 6.4 (5.8, 6.9); Stroke Inactive: 6.3 (5.7, 6.8), Active-Weekend Warrior: 6.3 (5.8, 6.8), Active-Regular: 6.4 (5.8, 6.9). The number at-risk over time is depicted below each plot. MVPA = moderate-to-vigorous physical activity. Shaded regions depict 95% confidence intervals.

**eFigure 5.** Associations between physical activity pattern and incident cardiovascular disease utilizing alternative definitions of weekend warrior activity

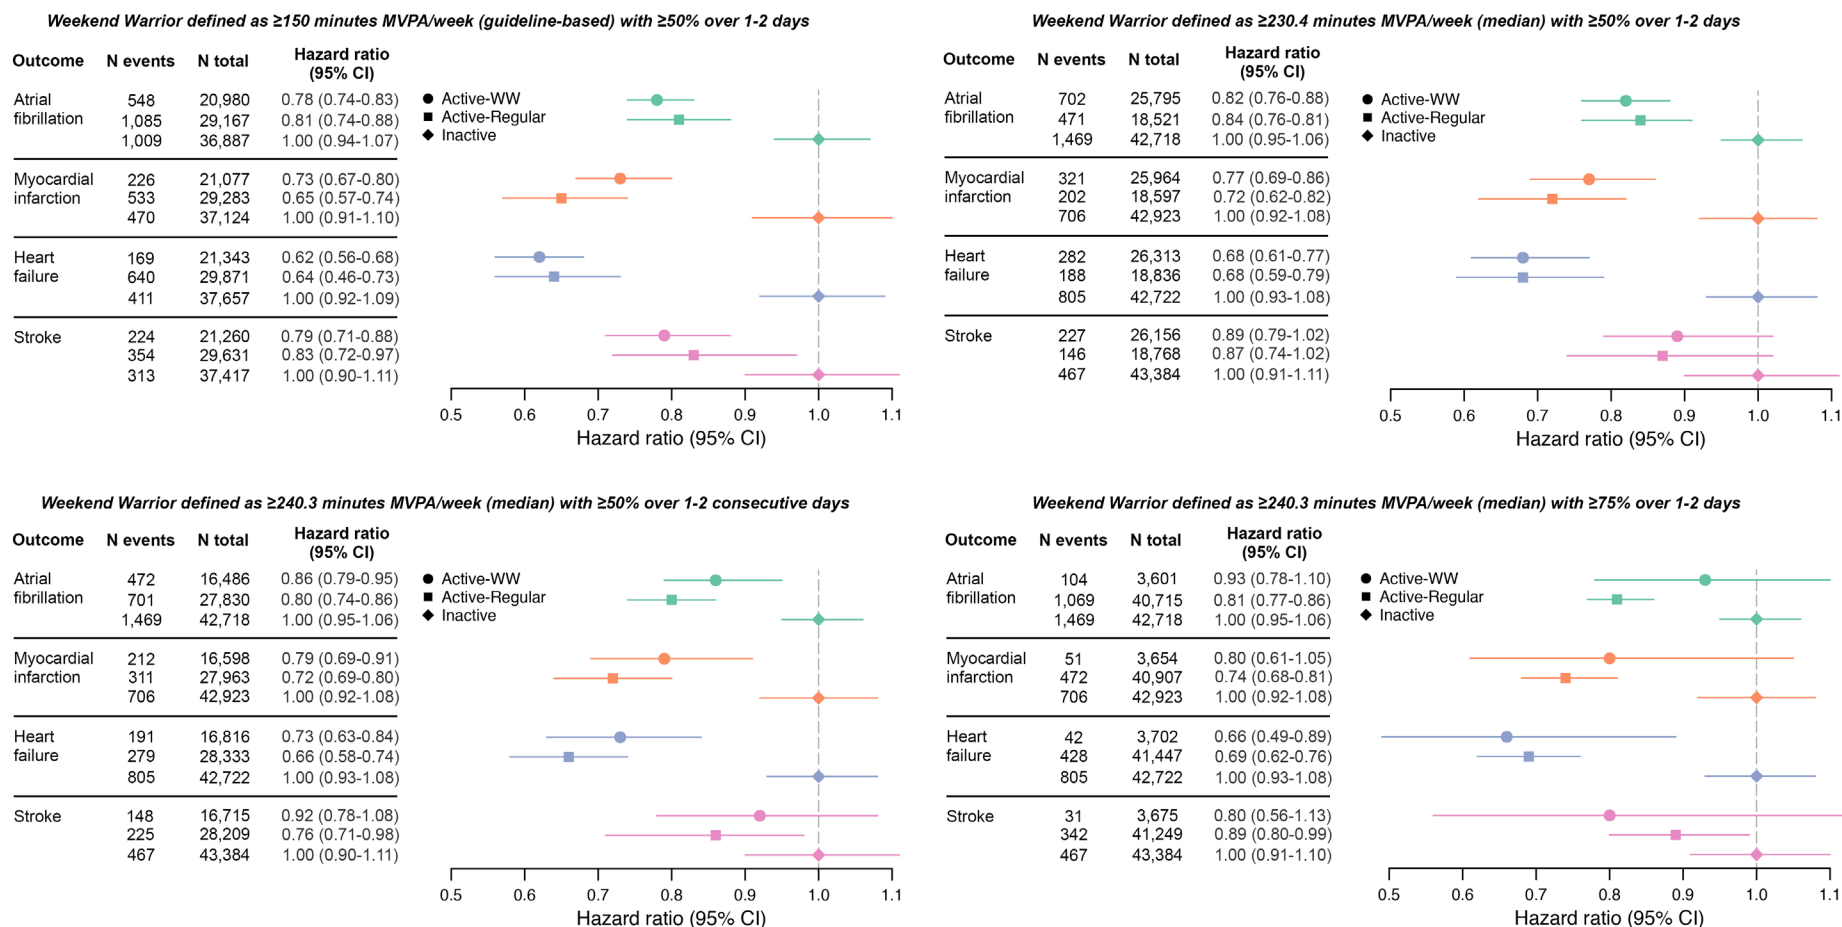

Depicted are forest plots depicting multivariable-adjusted associations between activity pattern and incident atrial fibrillation (green), myocardial infarction (orange), heart failure (blue), and stroke (purple). Additional methods of classifying the Active-WW pattern are compared. Three activity groups are compared: Inactive (reference, diamonds), Active-Weekend Warrior (“Active-WW”, circles), and Active-Regular (squares). Each plot depicts a different threshold used to define Inactive (see title above each plot). Bars depict 95% confidence intervals.

**eFigure 6.** Cumulative risk of incident musculoskeletal conditions stratified by activity pattern

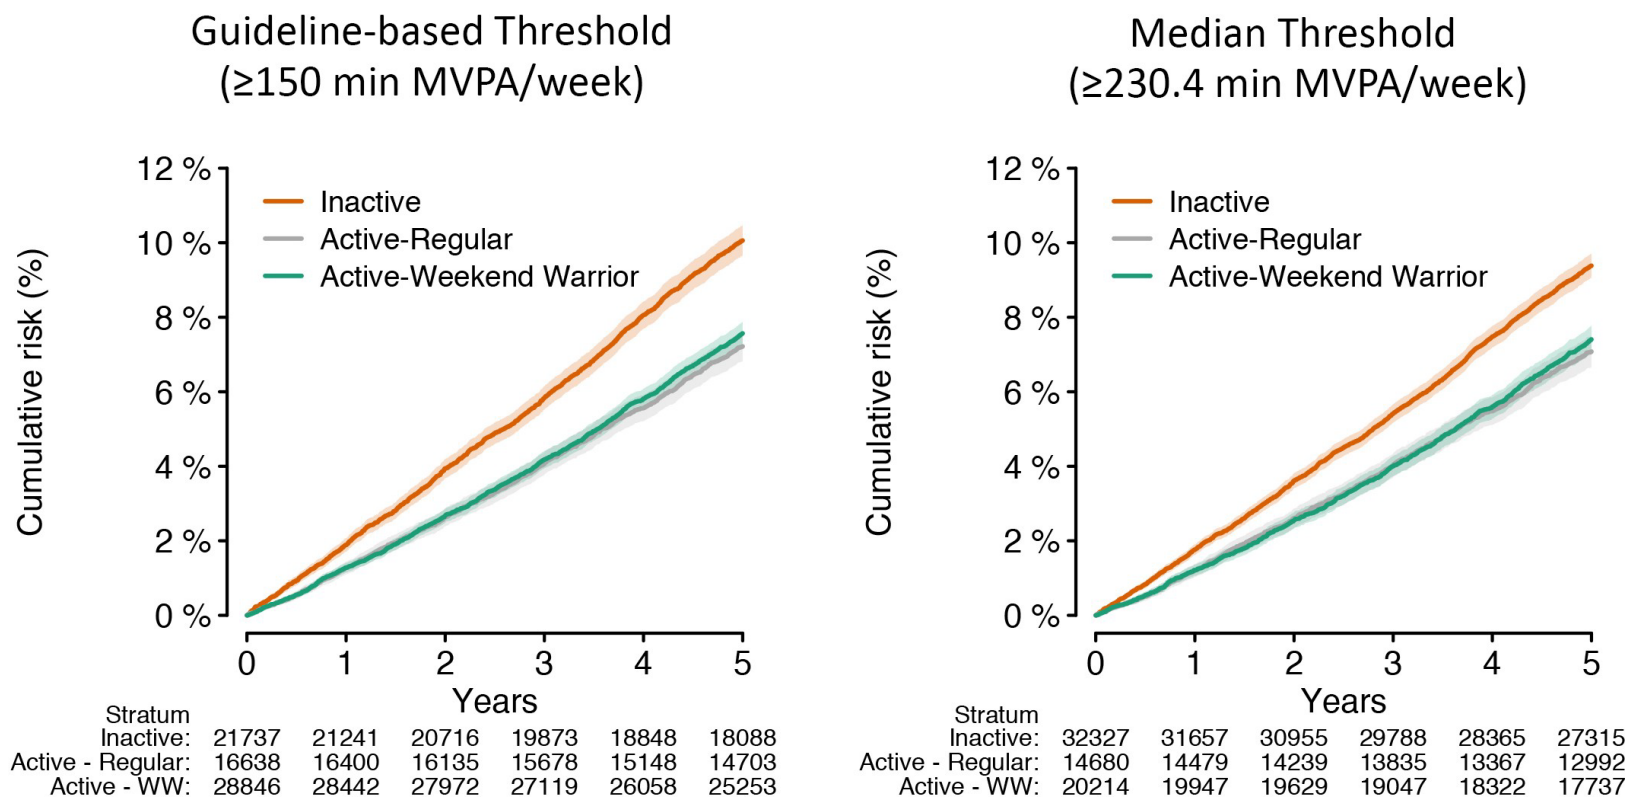

Plots depicting the crude cumulative risk of incident musculoskeletal conditions, stratified by accelerometer-derived activity pattern (Inactive = orange, Active-Weekend Warrior [Active-WW] = green, Active-Regular = gray). The left plot utilizes the guideline-based threshold ( $\geq 150$  minutes MVPA/week<sup>8-10</sup>) while the right plot utilizes the median threshold for activity ( $\geq 230.4$  minutes MVPA/week) while. Person-time in each stratum is summarized as follows: Guideline-based Inactive: 6.1 (5.5, 6.7), Guideline-based Active-Regular: 6.3 (5.6, 6.9), Guideline-based Active-Weekend Warrior: 6.2 (5.6, 6.8), Median Inactive: 6.2 (5.5, 6.8), Median Active-Regular: 6.3 (5.7, 6.9), Median Active-Weekend Warrior: 6.2 (5.6, 6.8). The number at-risk over time is depicted below each plot. MVPA = moderate-to-vigorous physical activity. Shaded regions depict 95% confidence intervals.

## eReferences

1. Walmsley R, Chan S, Smith-Byrne K, et al. Reallocation of time between device-measured movement behaviours and risk of incident cardiovascular disease. *Br J Sports Med*. 2021;56(18):1008-1017. doi:10.1136/bjsports-2021-104050
2. Khurshid S, Weng LC, Nauffal V, et al. Wearable accelerometer-derived physical activity and incident disease. *npj Digit Med*. 2022;5(1):131. doi:10.1038/s41746-022-00676-9
3. Hartnett DA, Milner JD, DeFroda SF. The Weekend Warrior: Common Shoulder and Elbow Injuries in the Recreational Athlete. *Am J Med*. 2022;135(3):297-301. doi:10.1016/j.amjmed.2021.08.015
4. Wu P, Gifford A, Meng X, et al. Mapping ICD-10 and ICD-10-CM Codes to Phecodes: Workflow Development and Initial Evaluation. *JMIR Med Inform*. 2019;7(4):e14325. doi:10.2196/14325
5. Halford JL, Weng LC, Choi SH, et al. Associations Between Alcohol Intake and Genetic Predisposition With Atrial Fibrillation Risk in a National Biobank. *Circ Genom Precis Med*. 2020;13(6):e003111. doi:10.1161/CIRCGEN.120.003111
6. Bhattacharya R, Zekavat SM, Uddin MM, et al. Association of Diet Quality With Prevalence of Clonal Hematopoiesis and Adverse Cardiovascular Events. *JAMA Cardiol*. 2021;6(9):1069-1077. doi:10.1001/jamacardio.2021.1678
7. Okbay A, Wu Y, Wang N, et al. Polygenic prediction of educational attainment within and between families from genome-wide association analyses in 3 million individuals. *Nat Genet*. 2022;54(4):437-449. doi:10.1038/s41588-022-01016-z
8. Arnett DK, Blumenthal RS, Albert MA, et al. 2019 ACC/AHA Guideline on the Primary Prevention of Cardiovascular Disease: A Report of the American College of Cardiology/American Heart Association Task Force on Clinical Practice Guidelines. *Circulation*. 2019;140(11):e596-e646. doi:10.1161/CIR.0000000000000678
9. *Global Recommendations on Physical Activity for Health*. WHO; 2010.
10. National Health Service. Physical activity guidelines for adults aged 19 to 64. <https://www.nhs.uk/live-well/exercise/exercise-guidelines/physical-activity-guidelines-for-adults-aged-19-to-64/>.
