# Supplementary material
Source: PubMed Central journal article supplement (PMC10354673)
Supplement: jama-e2310875-s002.pdf [file jama-e2310875-s002.pdf]

## Data Sharing Statement

Khurshid. Accelerometer-Derived “Weekend Warrior” Physical Activity and Incident Cardiovascular Disease. *JAMA*. Published July 18, 2023. doi:10.1001/jama.2023.10875

### Data

**Data available:** No

### Additional Information

**Explanation for why data not available:** UK Biobank data are available by application (<https://www.ukbiobank.ac.uk/enable-your-research/register>)
